# Supplementary material
Source: PubMed Central journal article supplement (PMC5207228)

**S5 Figure. MRM scanning of different lipid species.** Representative MRM chromatograms for each sample is depicted.

**MRM Scanning Chromatograms of Sphingosine, Sphingosine-1phosphate  
and Ceramide species**

# KuWT: Cer

RT: 0.00 - 34.02

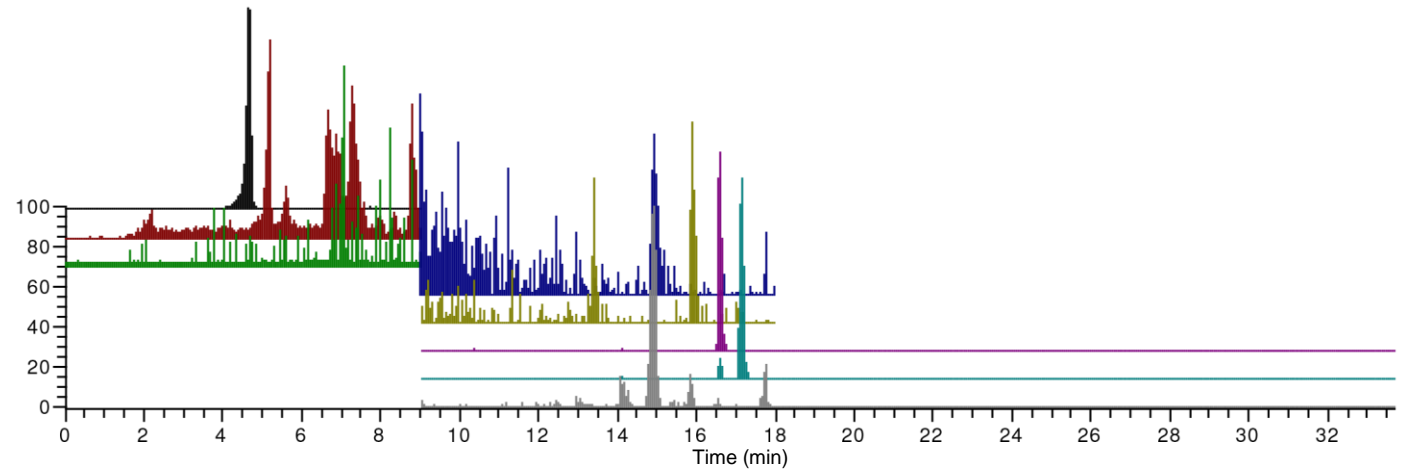

- C17-Sph
- Sph
- Sph-1-P
- Cer-14:0
- Cer-16:0
- Cer-18:1
- Cer-18:0
- Cer-20:1

RT: 0.00 - 34.02

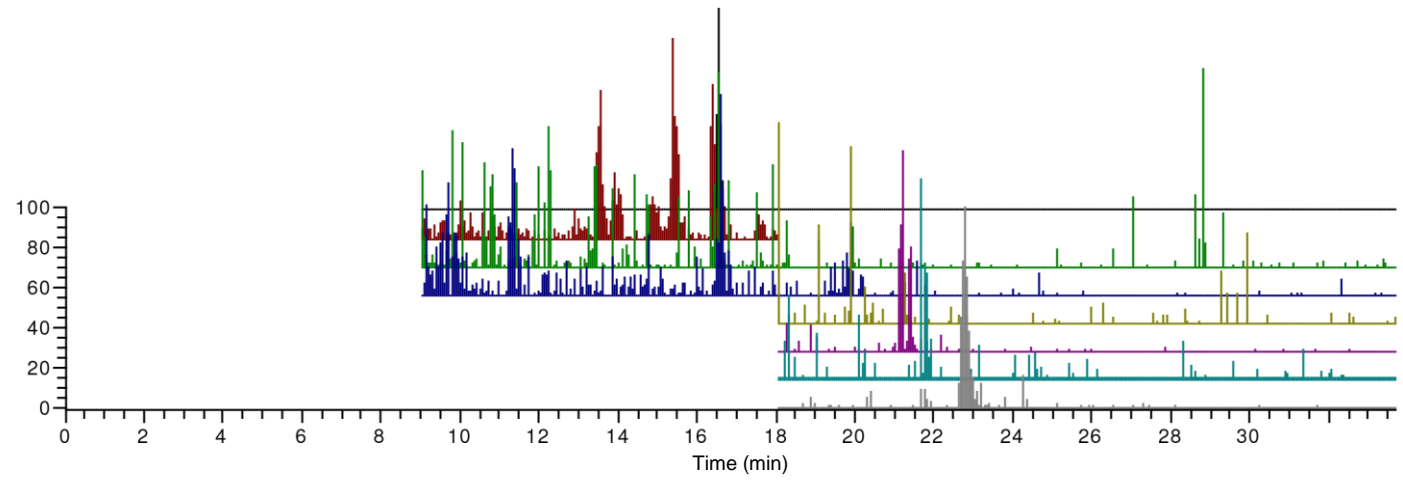

- C17-Cer
- Cer-20:0
- Cer-22:1
- Cer-22:0
- Cer-24:1
- Cer-24:0
- Cer-26:1
- Cer-26:0

KuWT + 1M Sorbitol: Cer

RT: 0.00 - 34.02

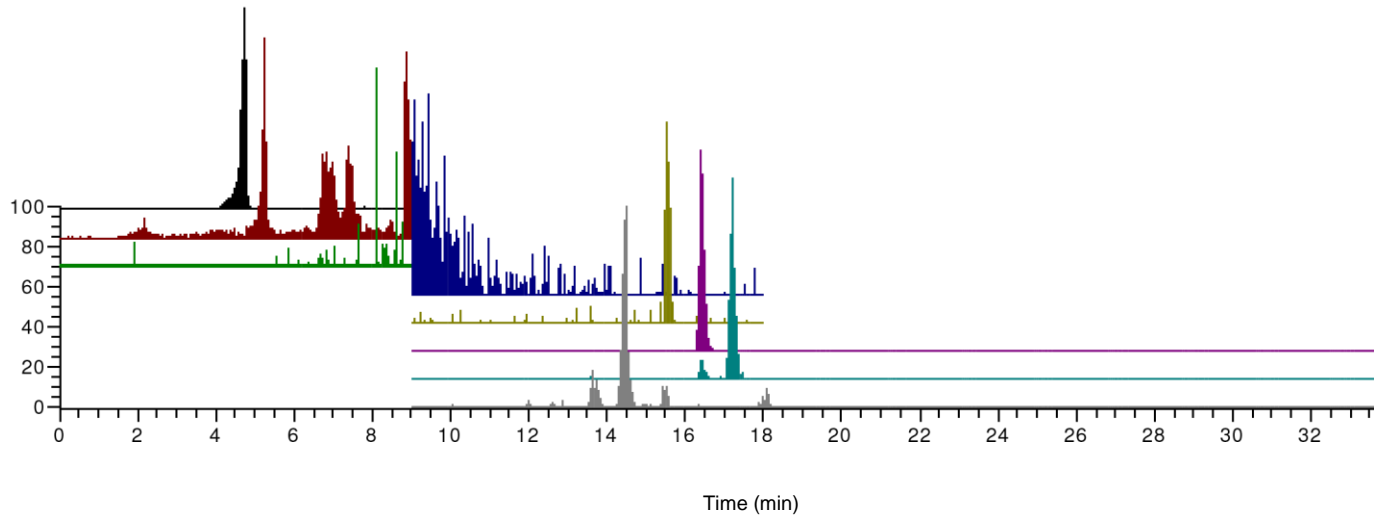

Cer-14:0  
Cer-16:0

RT: 0.00 - 34.01

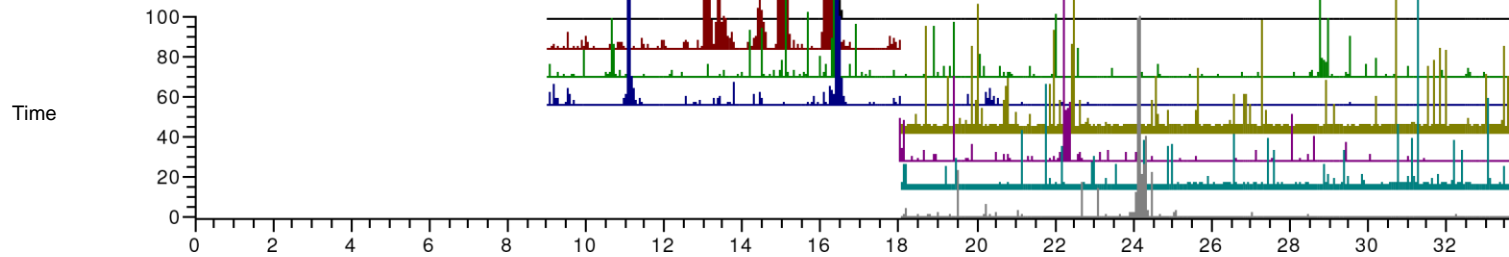

(min)  
Ku $\Delta$ schA: Cer

RT: 0.00 - 34.02

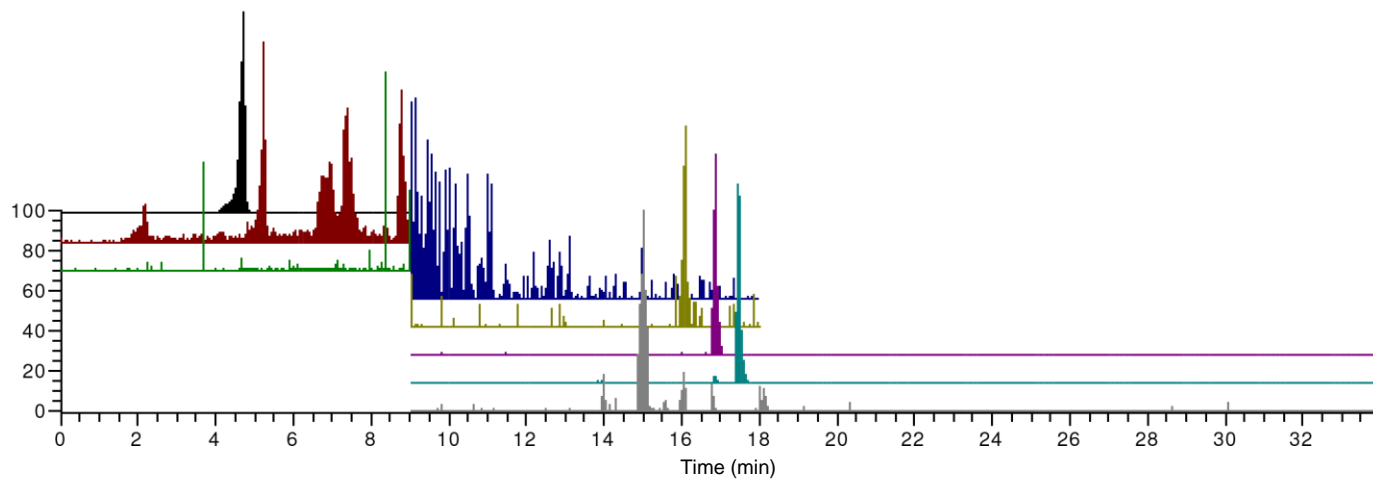

C17-Sph  
Sph  
Sph-1-P  
Cer-14:0  
Cer-16:0  
Cer-18:1  
Cer-18:0  
Cer-20:1

RT: 0.00 - 34.02

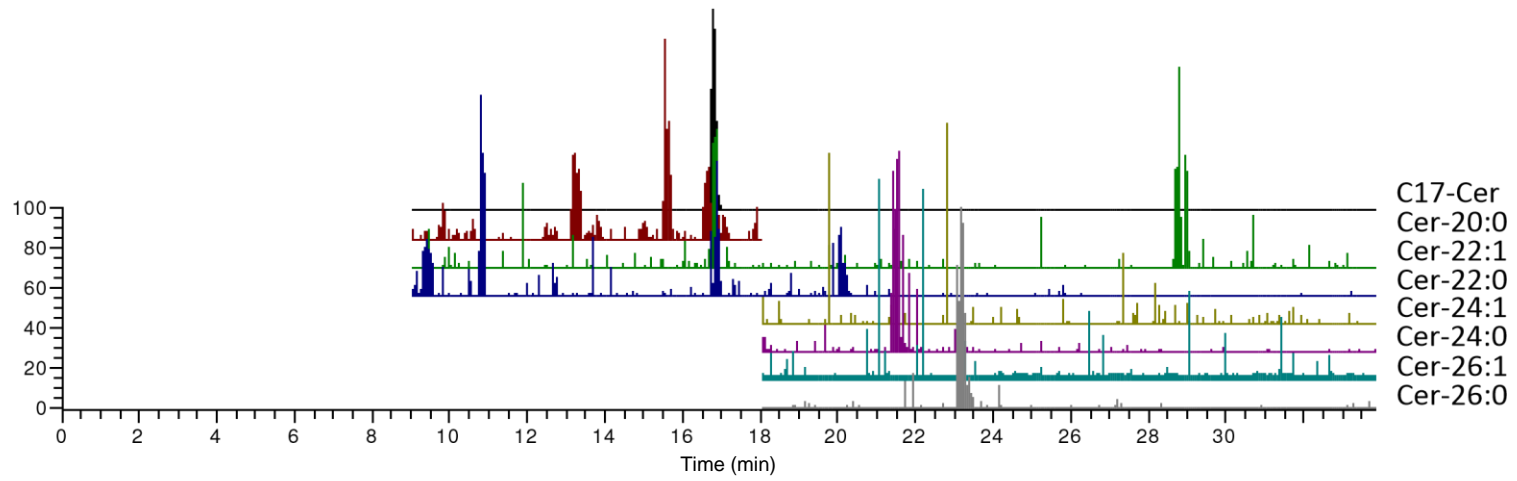

Ku $\Delta$ schA + 1M Sorbitol: Cer

RT: 0.00 - 34.02

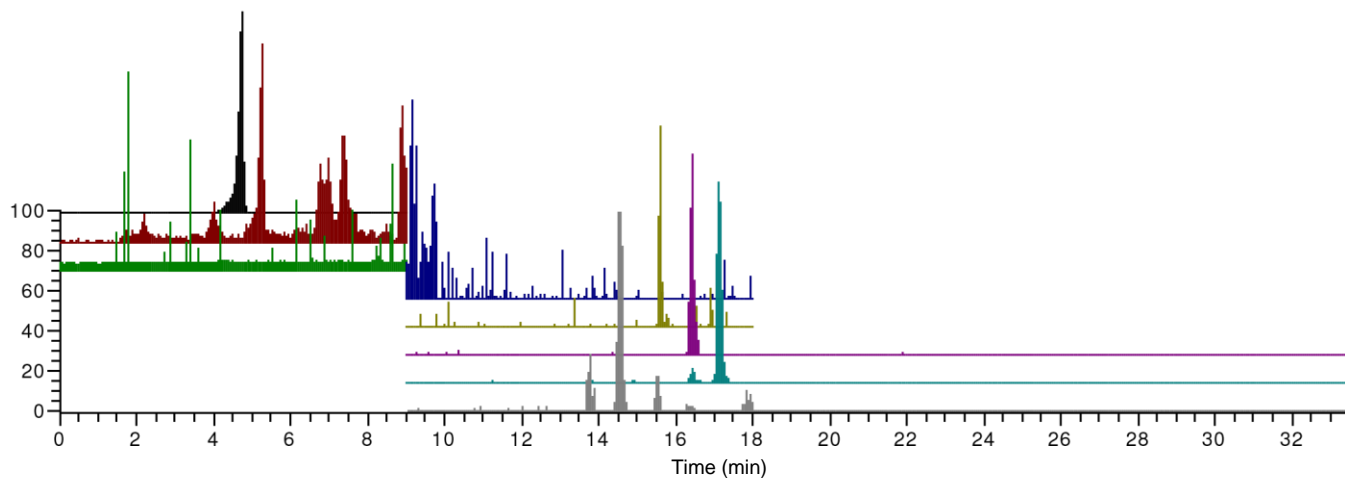

C17-Sph  
Sph  
Sph-1-P  
Cer-14:0  
Cer-16:0  
Cer-18:1  
Cer-18:0  
Cer-20:1

RT: 0.00 - 34.01

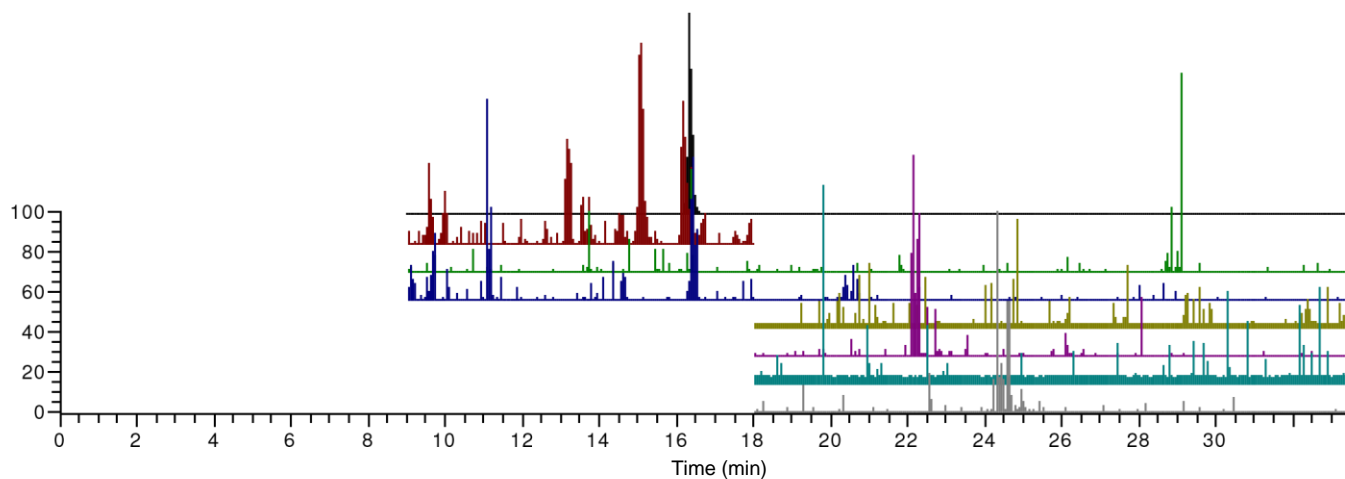

C17-Cer  
Cer-20:0  
Cer-22:1  
Cer-22:0  
Cer-24:1  
Cer-24:0  
Cer-26:1  
Cer-26:0

# MRM Scanning Chromatograms of Dihydrosphingosine, Dihydrosphingosine-1-phosphate and Dihydroceramide species

KuWT: dhCer

RT: 0.00 - 34.02

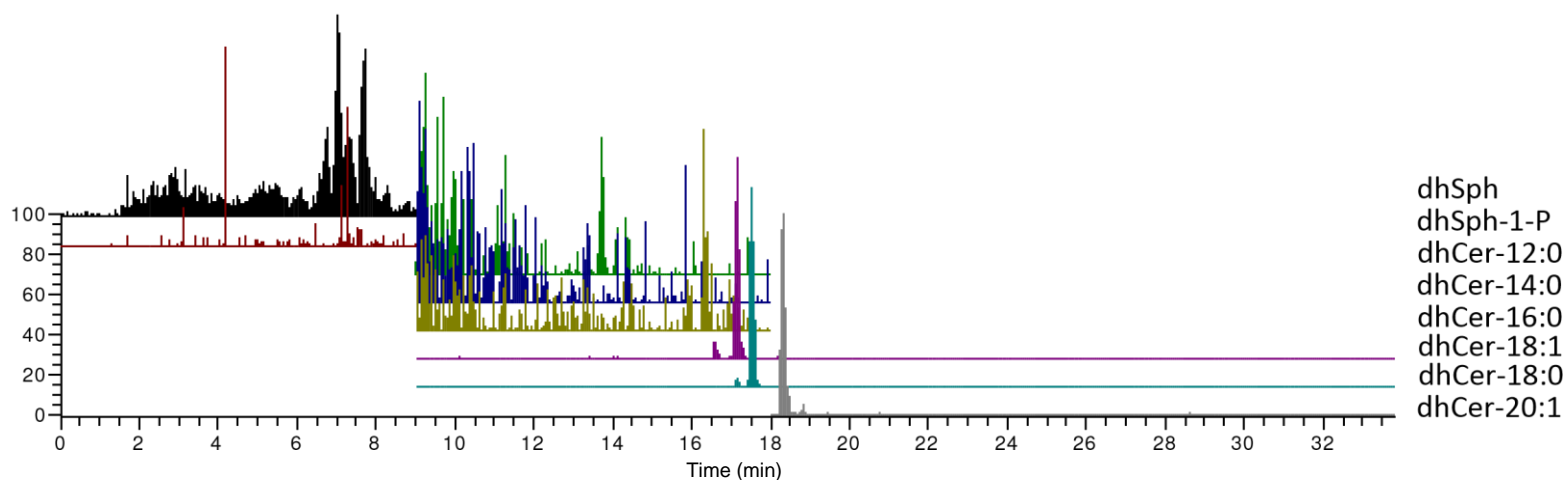

RT: 0.00 - 34.02

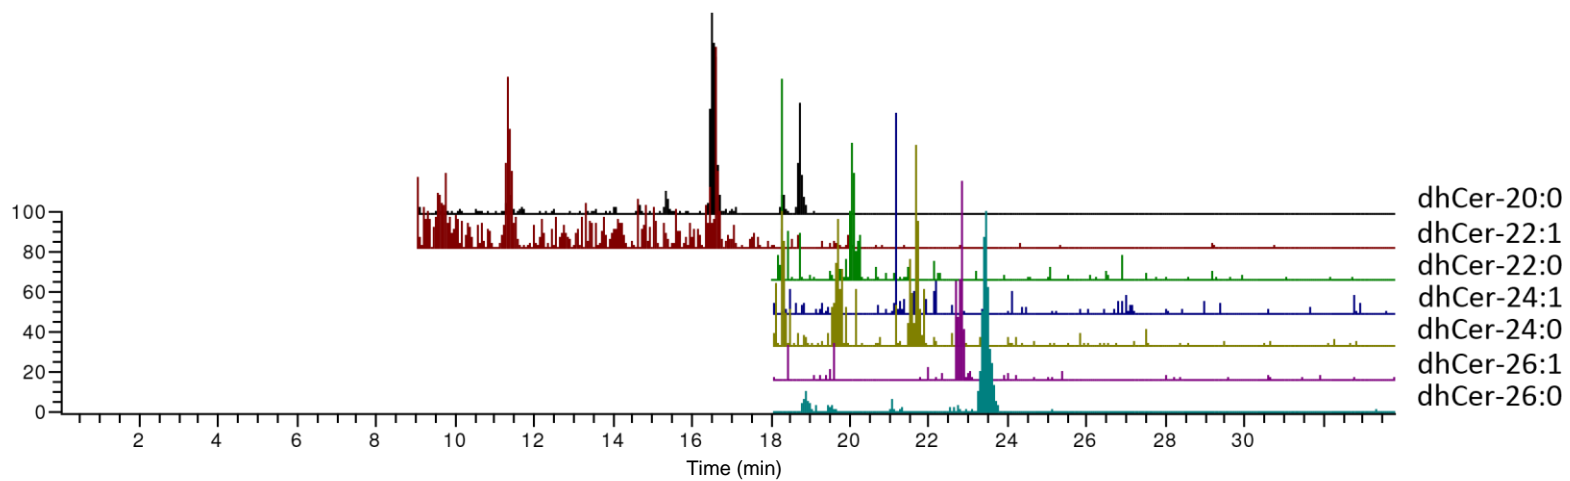

KuWT + 1M Sorbitol: dhCer

dhSph dhSph-1-P dhCer-12:0 dhCer-14:0 dhCer-16:0 dhCer-18:1 dhCer-18:0 dhCer-20:1



Time (min) RT: 0.00 - 34.02

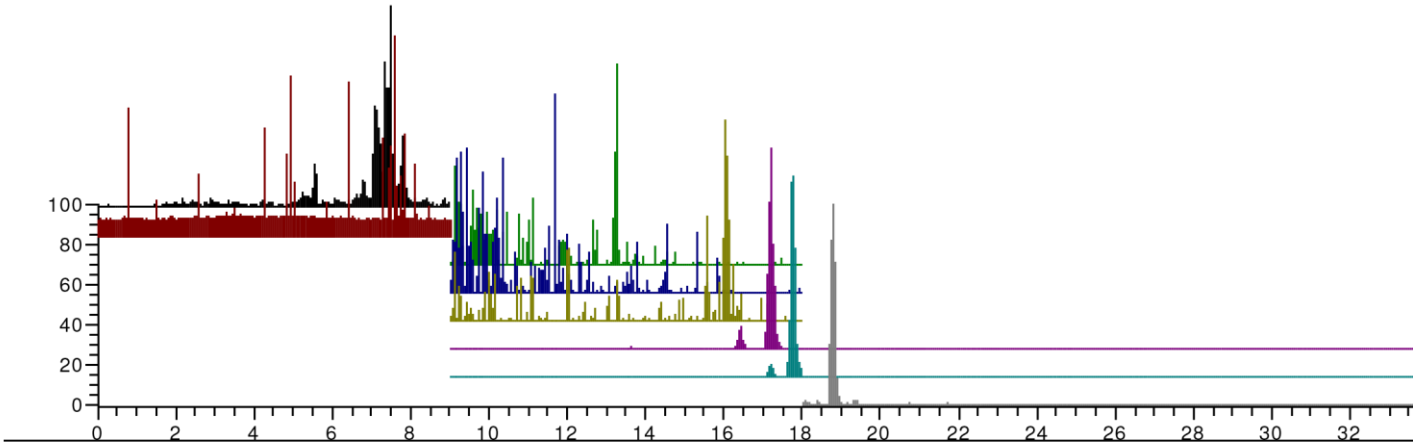

dhCer-20:0  
dhCer-22:1  
dhCer-22:0  
dhCer-24:1  
dhCer-24:0  
dhCer-26:1  
dhCer-26:0

RT: 0.00 - 34.01

Time (min)

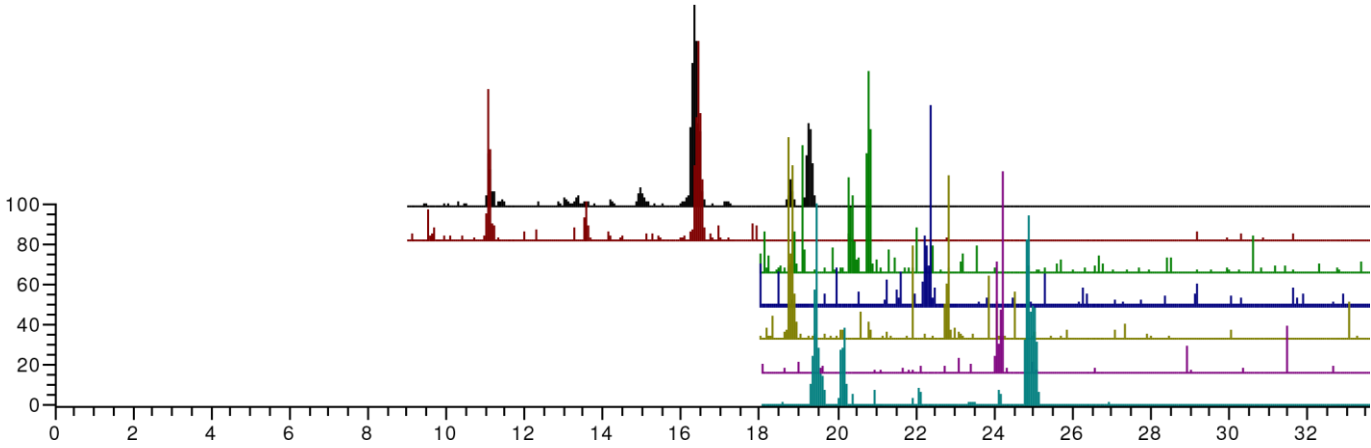

Ku $\Delta$ schA:  
dhCer

RT: 0.00 - 34.02

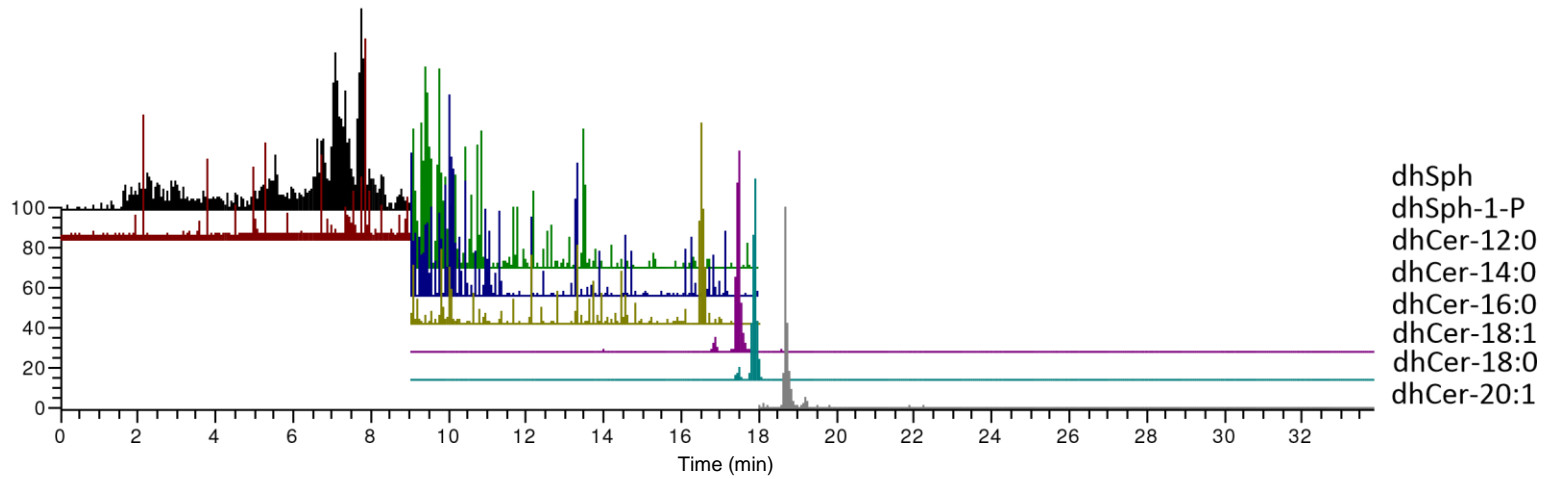

RT: 0.00 - 34.02

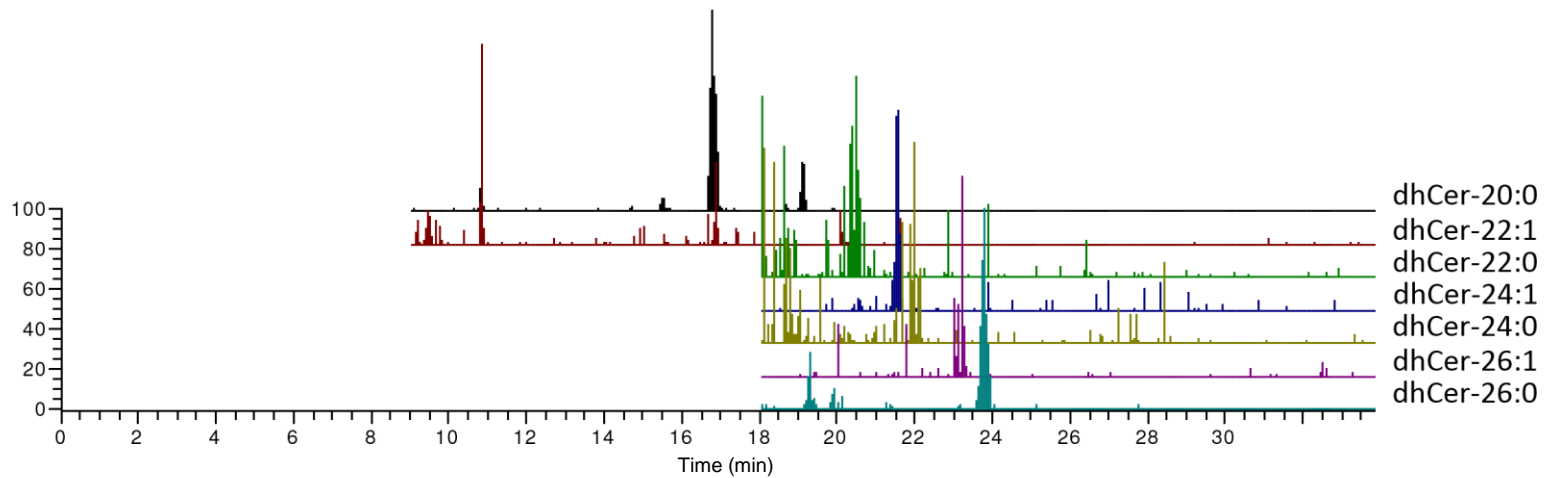

Ku $\Delta$ schA + 1M Sorbitol: dhCer

RT: 0.00 - 34.02

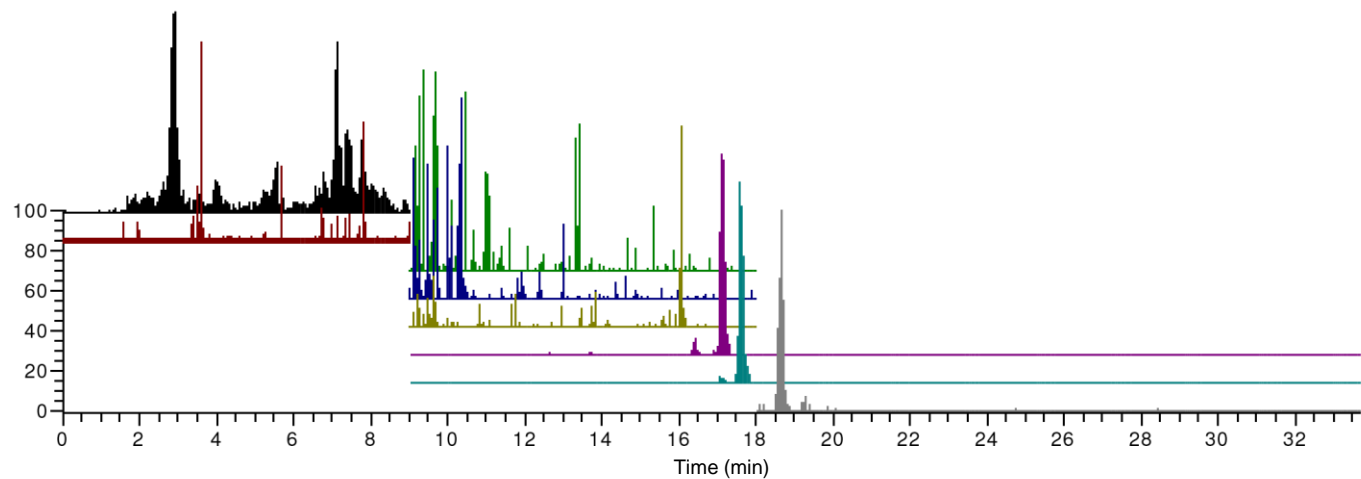

RT: 0.00 - 34.01

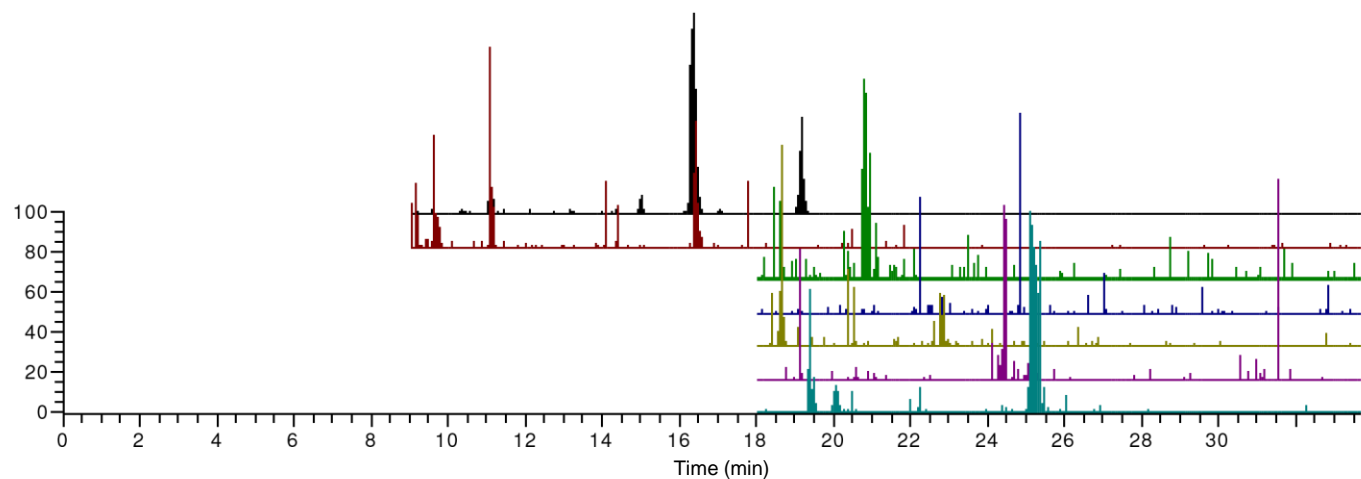

## **MRM Scanning Chromatograms of Phytoceramide species**

KuWT: PhytoCer

RT: 0.00 - 37.52

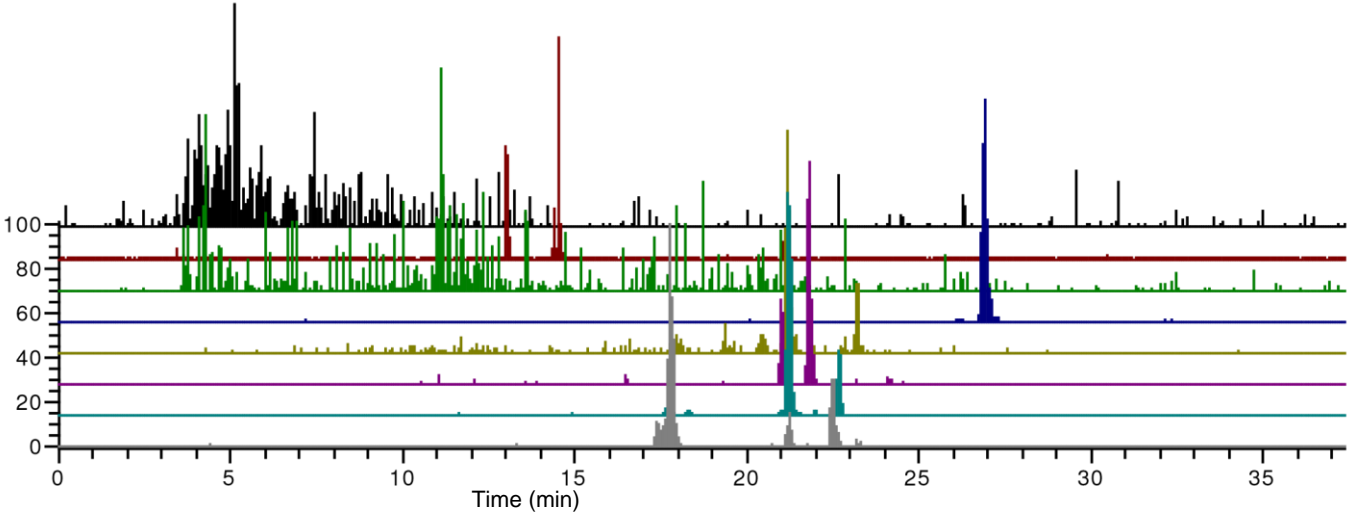

PhytoSph

PhytoSph-1-P

PhytoCer-14:0

PhytoCer-16:0

PhytoCer-18:1

PhytoCer-18:0

PhytoCer-20:1

PhytoCer-20:0

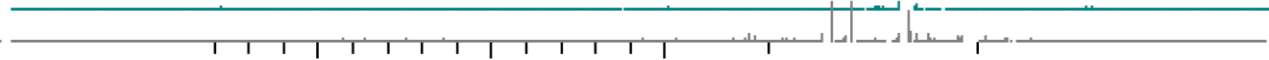

PhytoCer-28:0

RT: 0.00 - 37.52

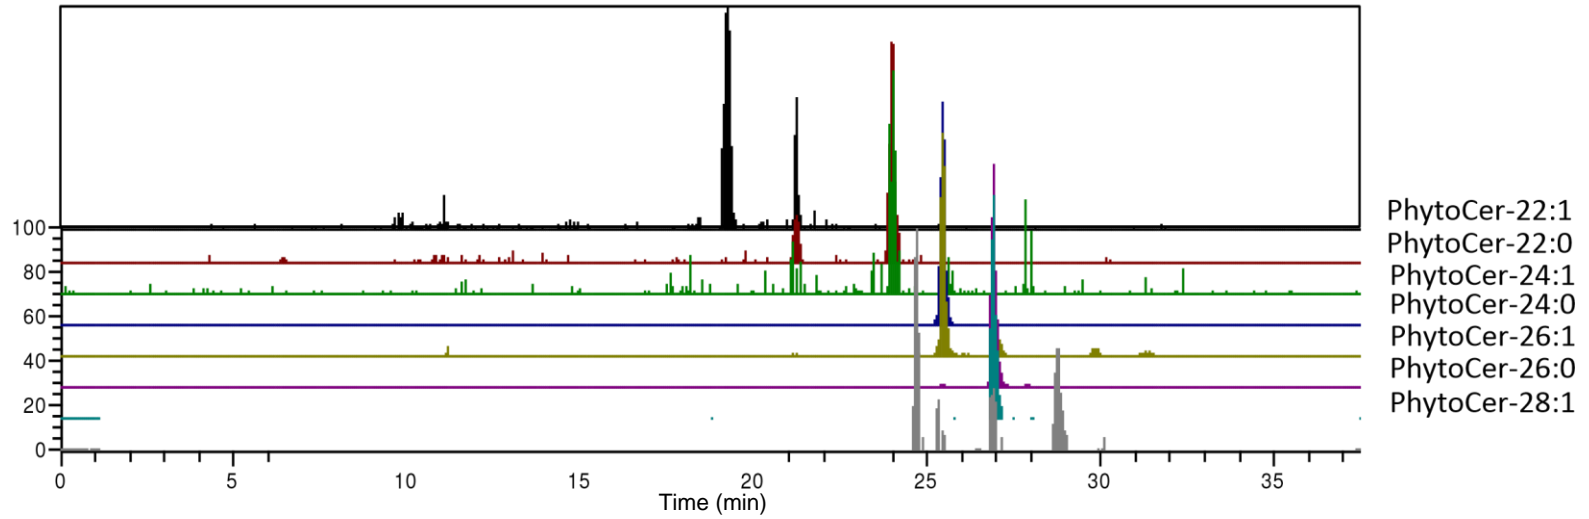

KuWT + 1M Sorbitol: PhytoCer

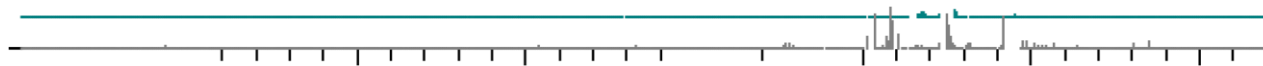

PhytoCer-28:0

RT: 0.00 - 37.52

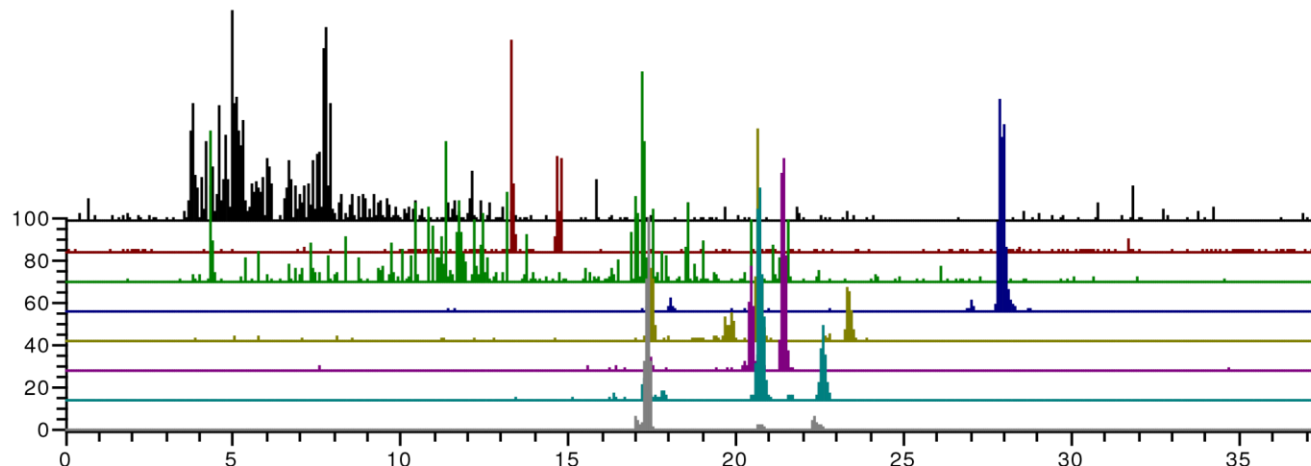

PhytoSph  
PhytoSph-1-P  
PhytoCer-14:0  
PhytoCer-16:0  
PhytoCer-18:1  
PhytoCer-18:0  
PhytoCer-20:1  
PhytoCer-20:0

RT: 0.00 - 37.52

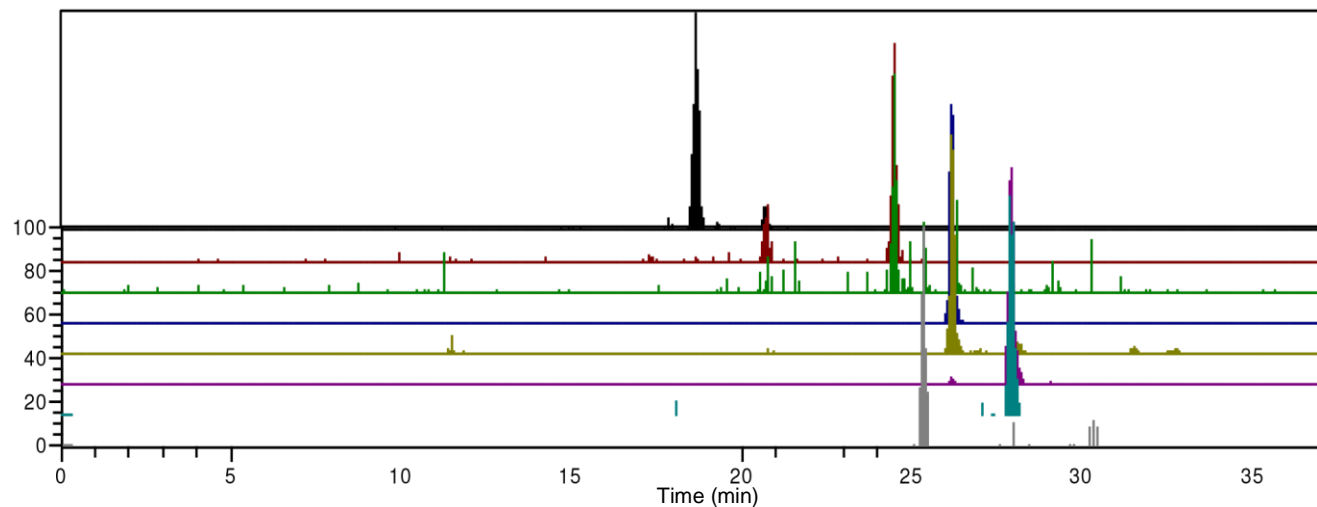

PhytoCer-22:1  
PhytoCer-22:0  
PhytoCer-24:1  
PhytoCer-24:0  
PhytoCer-26:1  
PhytoCer-26:0  
PhytoCer-28:1

Time (min)

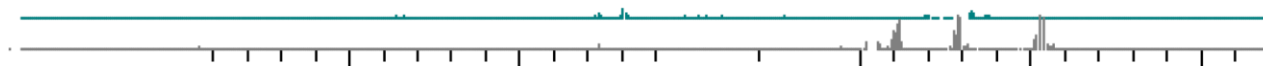

PhytoCer-28:0

RT: 0.00 - 37.52

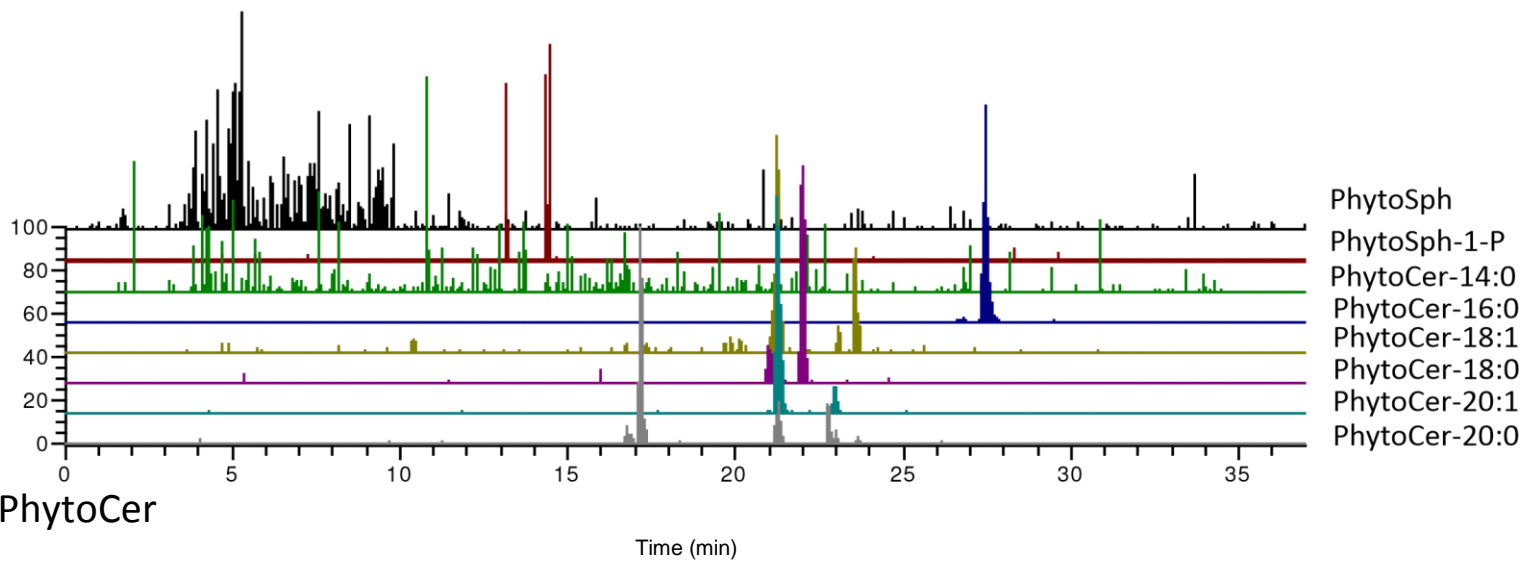

Ku $\Delta$ schA: PhytoCer



PhytoCer-28:0



Time (min)

RT: 0.00 - 37.52

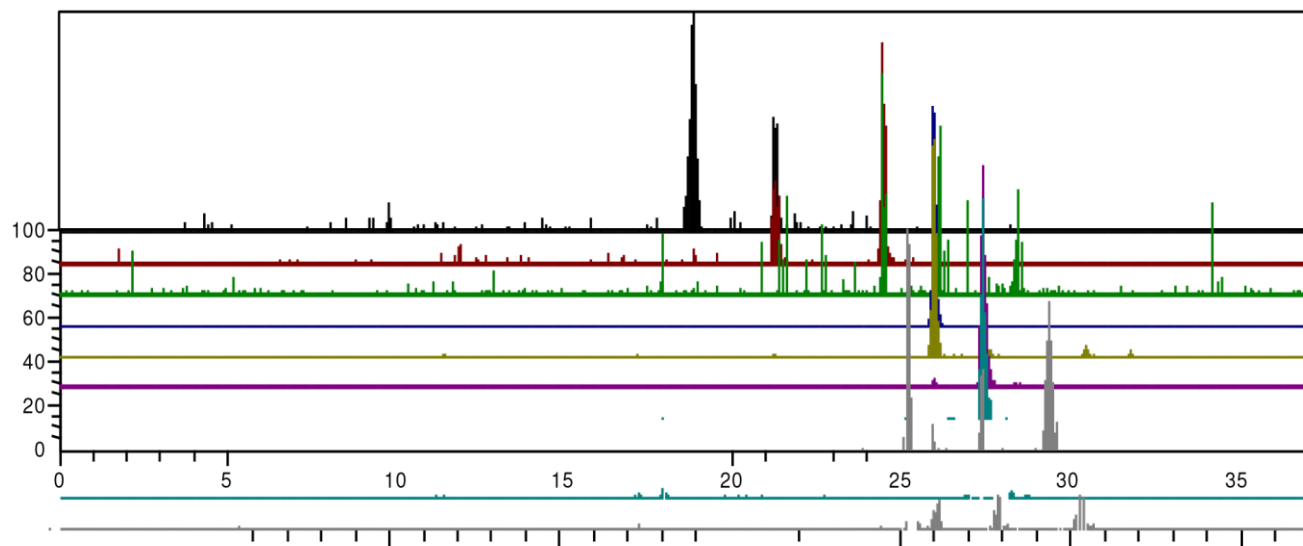

PhytoCer-22:1  
PhytoCer-22:0  
PhytoCer-24:1  
PhytoCer-24:0  
PhytoCer-26:1  
PhytoCer-26:0  
PhytoCer-28:1

PhytoCer-28:0

# Ku $\Delta$ schA + 1M Sorbitol: PhytoCer

RT: 0.00 - 37.52

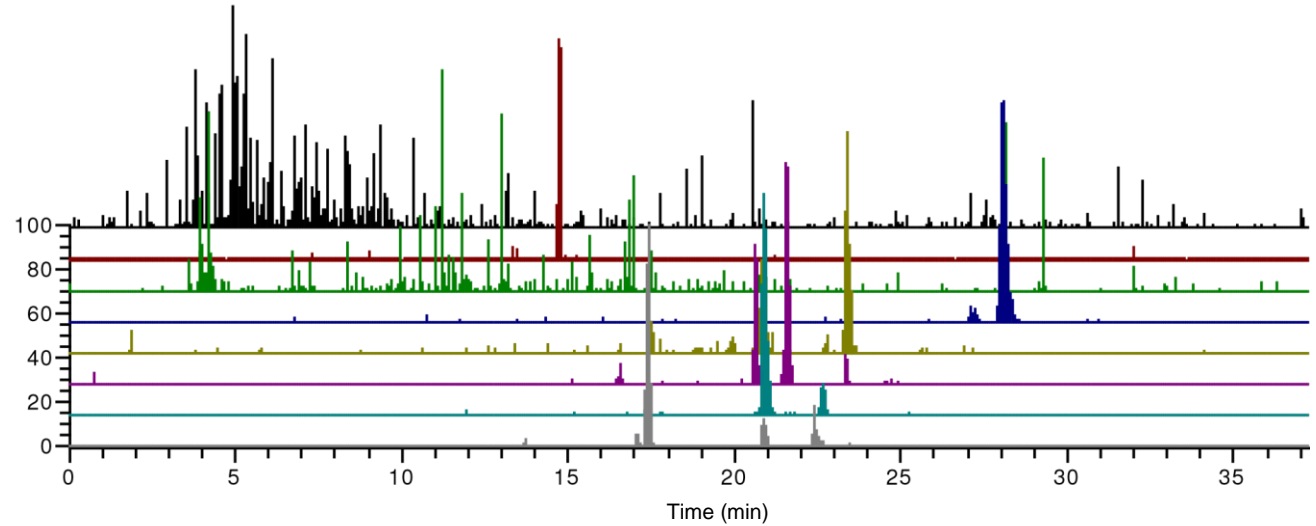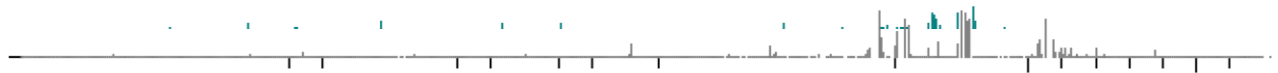

RT: 0.00 - 37.52

Time (min)

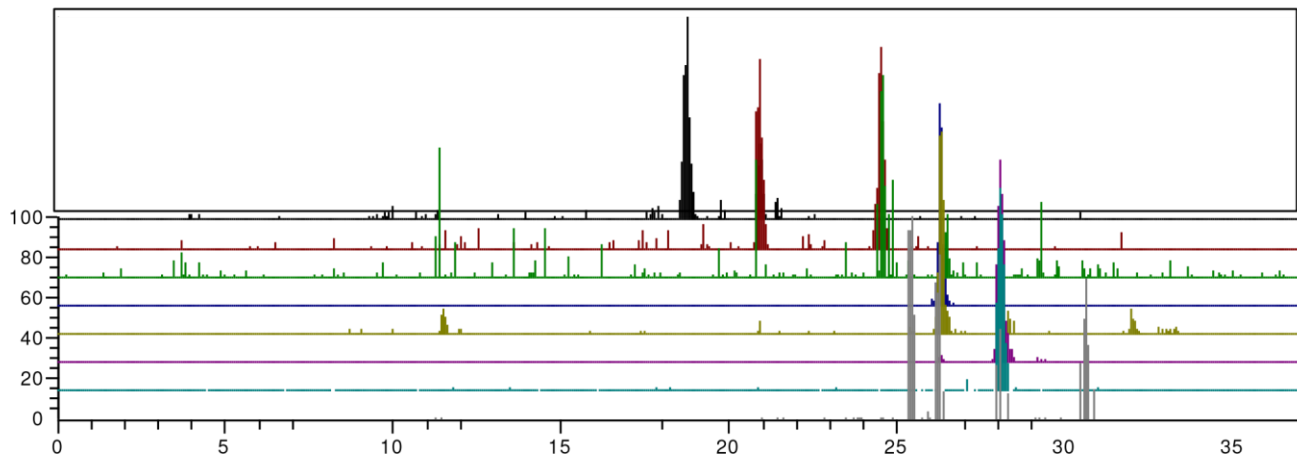

**MRM  
Scanning**

**Chromatograms of  $\alpha$ OH-Phytoceramide species**

KuWT:  $\alpha$ OH-

PhytoCer

RT: 0.00 - 30.01

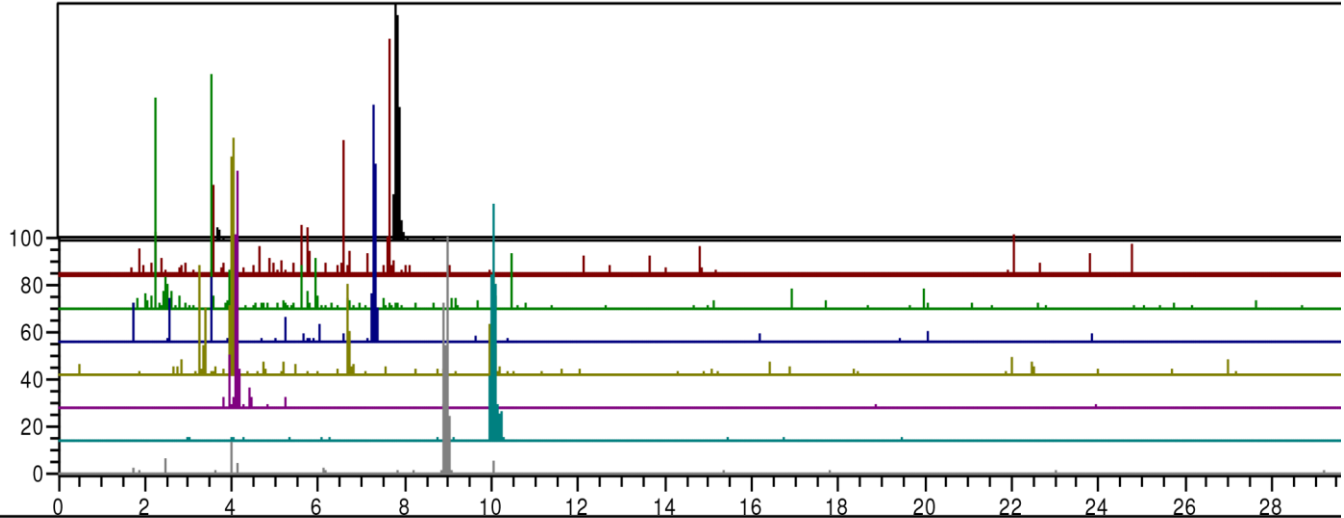

Cer-20:1

(min)

RT: 0.00 - 30.01

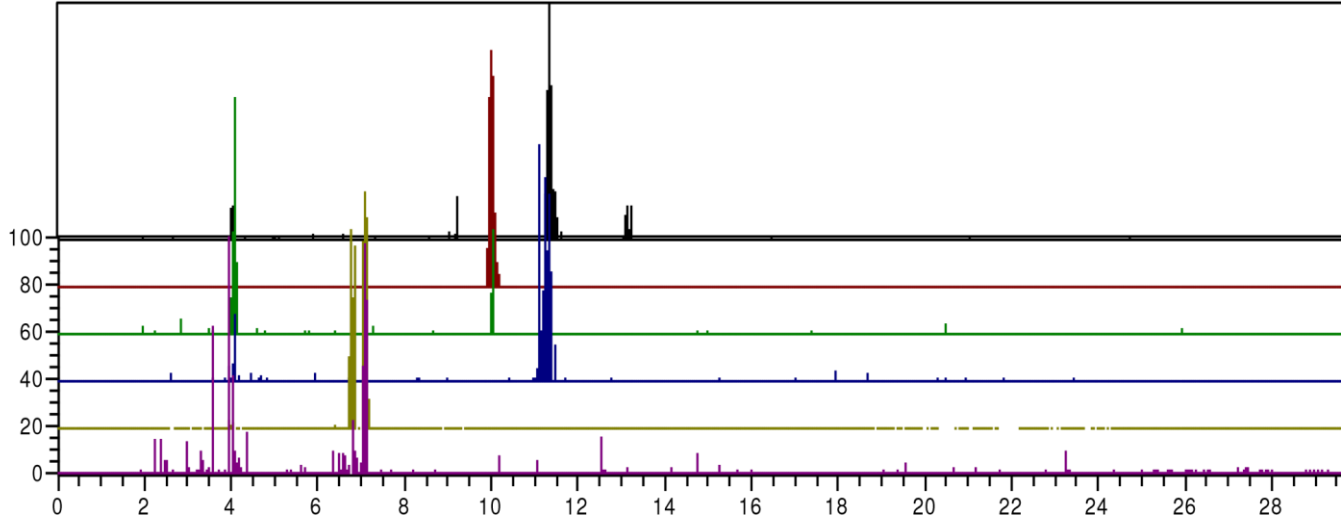

Cer-28:1

(min)

$\alpha$ OH-PhytoCer-28:0

Time

# KuWT + 1M Sorbitol: $\alpha$ OH-PhytoCer

RT: 0.00 - 30.01

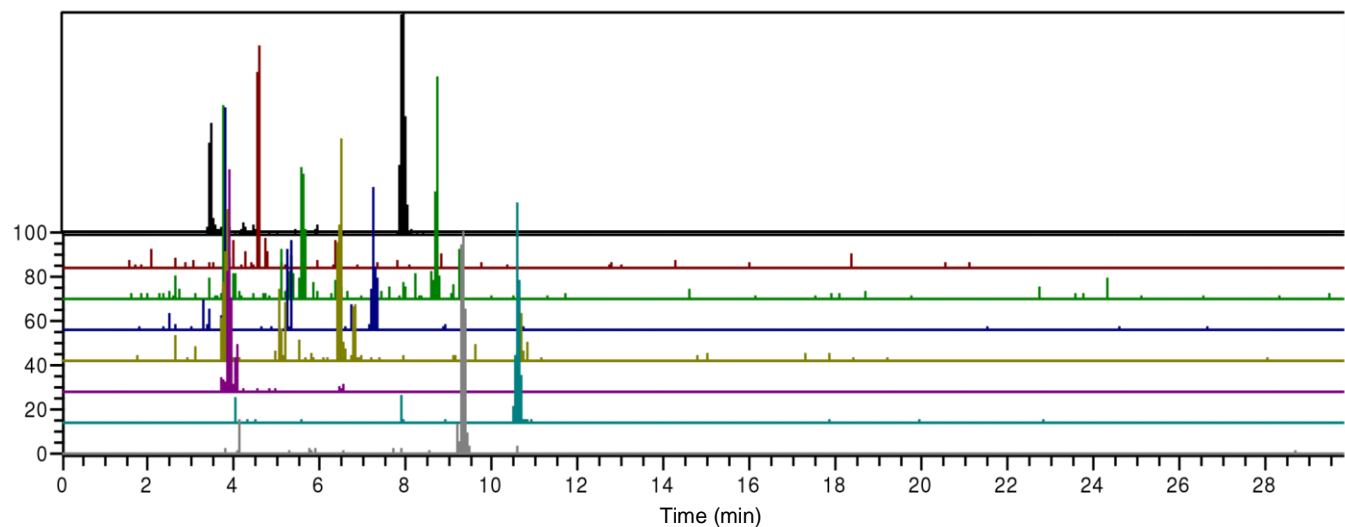

- $\alpha$ OH-PhytoCer-14:0
- $\alpha$ OH-PhytoCer-16:0
- $\alpha$ OH-PhytoCer-18:1
- $\alpha$ OH-PhytoCer-18:0
- $\alpha$ OH-PhytoCer-20:1
- $\alpha$ OH-PhytoCer-20:0
- $\alpha$ OH-PhytoCer-22:1
- $\alpha$ OH-PhytoCer-22:0

RT: 0.00 - 30.01

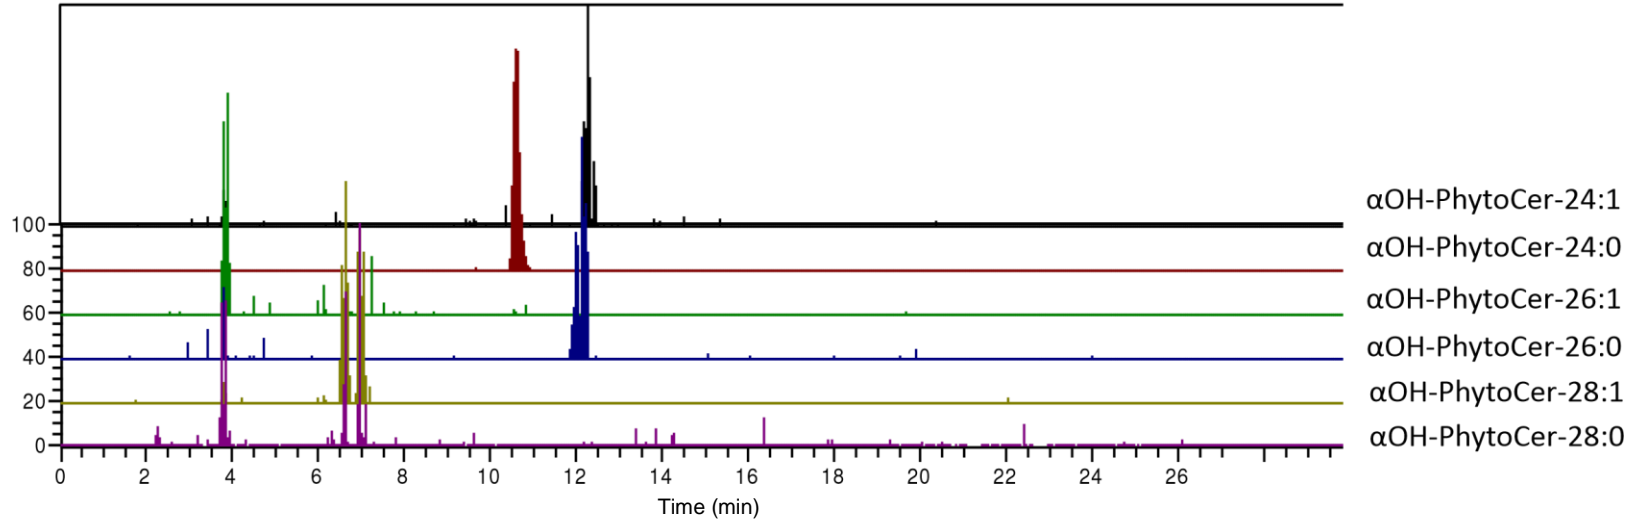

Ku $\Delta$ schA:  $\alpha\text{OH-PhytoCer}$

RT: 0.00 - 30.01

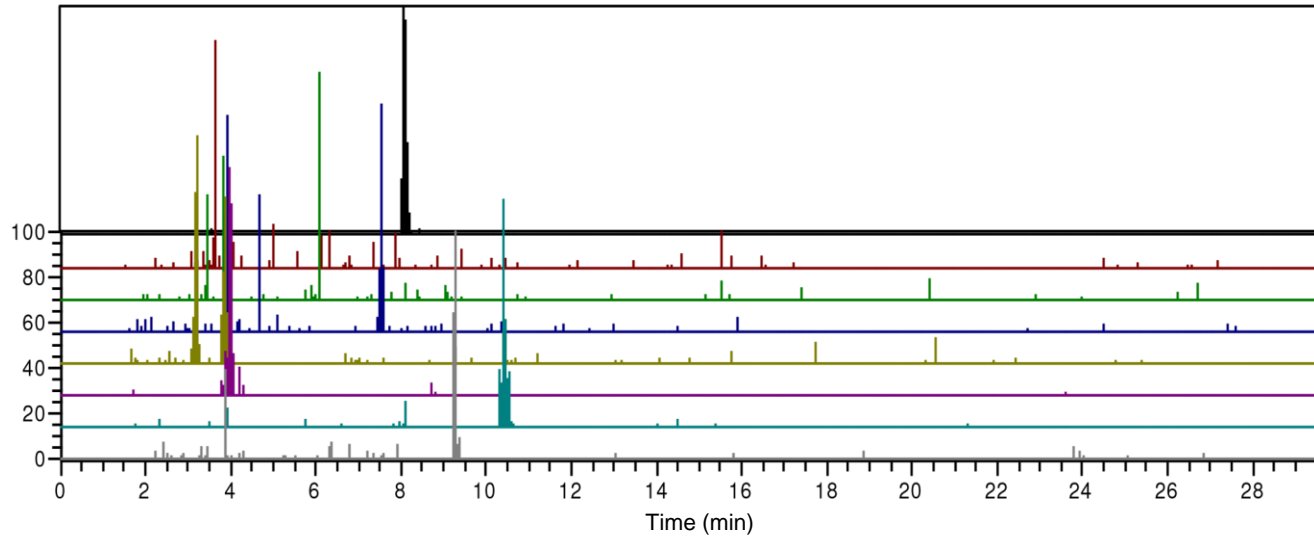

$\alpha$ -OH-PhytoCer-14:0  
 $\alpha$ -OH-PhytoCer-16:0  
 $\alpha$ -OH-PhytoCer-18:1  
 $\alpha$ -OH-PhytoCer-18:0  
 $\alpha$ -OH-PhytoCer-20:1  
 $\alpha$ -OH-PhytoCer-20:0  
 $\alpha$ -OH-PhytoCer-22:1  
 $\alpha$ -OH-PhytoCer-22:0

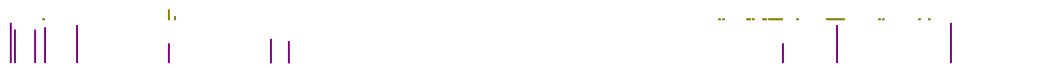

RT: 0.00 - 30.01

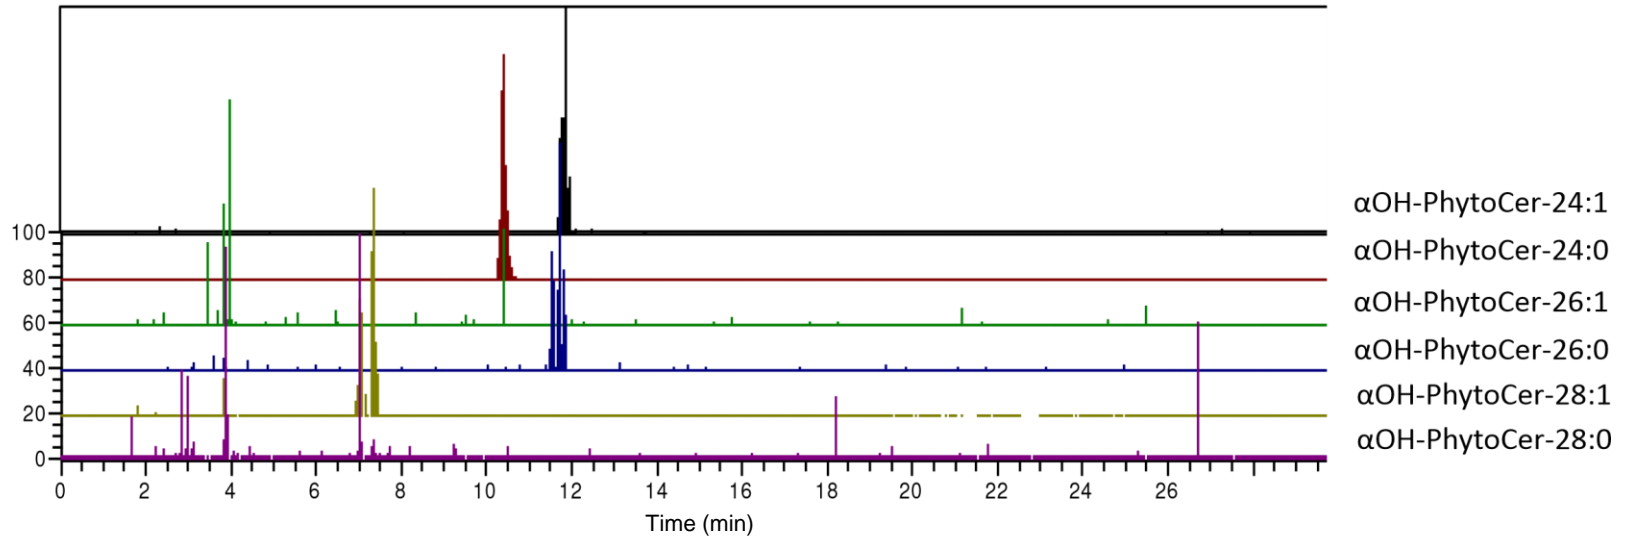

Ku $\Delta$ schA + 1M Sorbitol:  $\alpha$ OH-PhytoCer

toCer-16:0  $\alpha$ OH-PhytoCer-18:1  $\alpha$ OH-PhytoCer-18:0  $\alpha$ OH-PhytoCer-20:1



RT: 0.00 - 30.01

Time

(min)

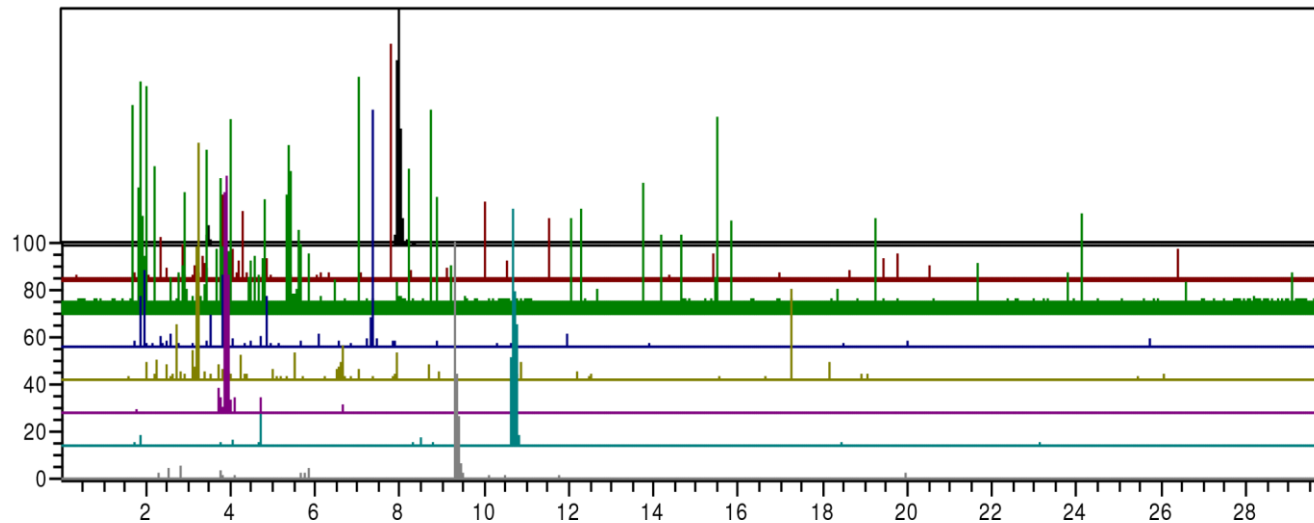

Cer-28:1

$\alpha$ OH-PhytoCer-28:0

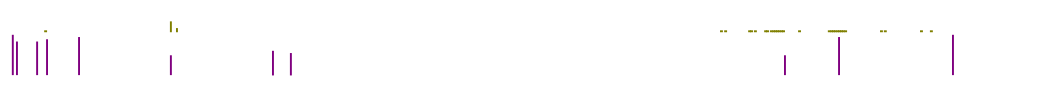

Time

RT: 0.00 - 30.01

(min)

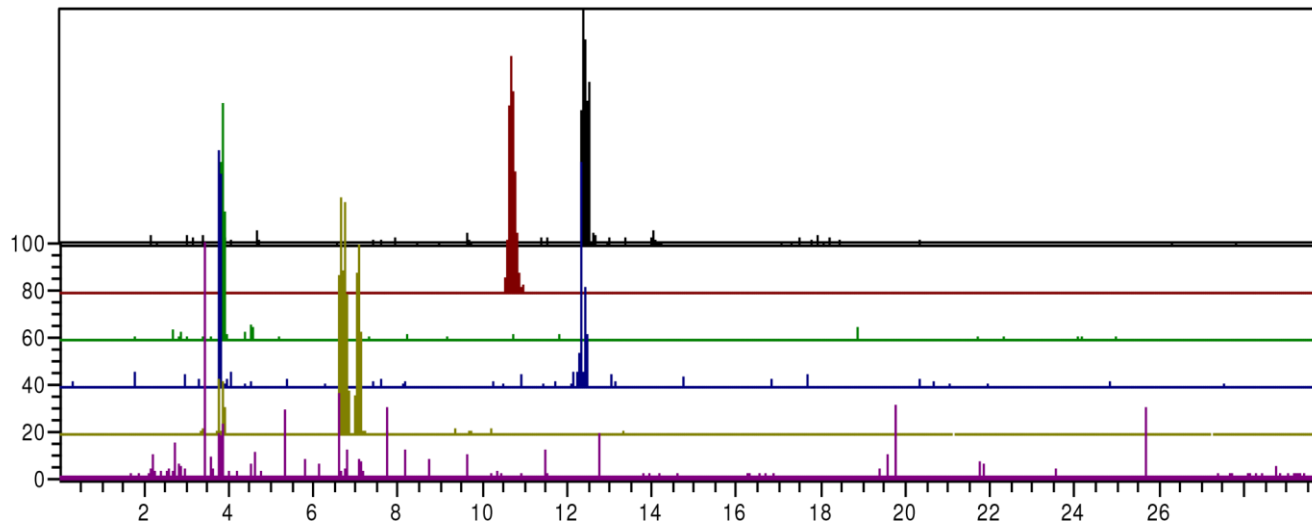

# MRM Scanning Chromatograms of $\alpha$ OH-Ceramide and Hexosylceramide species

KuWT: OHCer/HexCer

RT: 0.00 - 34.01

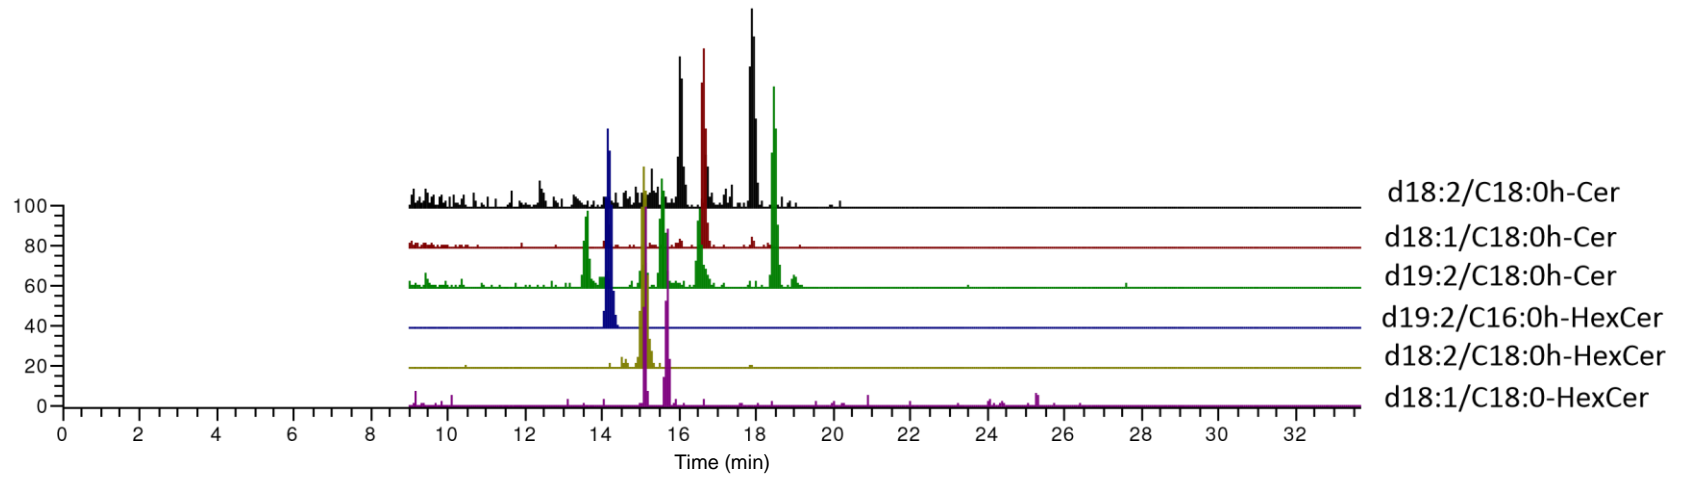

RT: 0.00 - 34.01

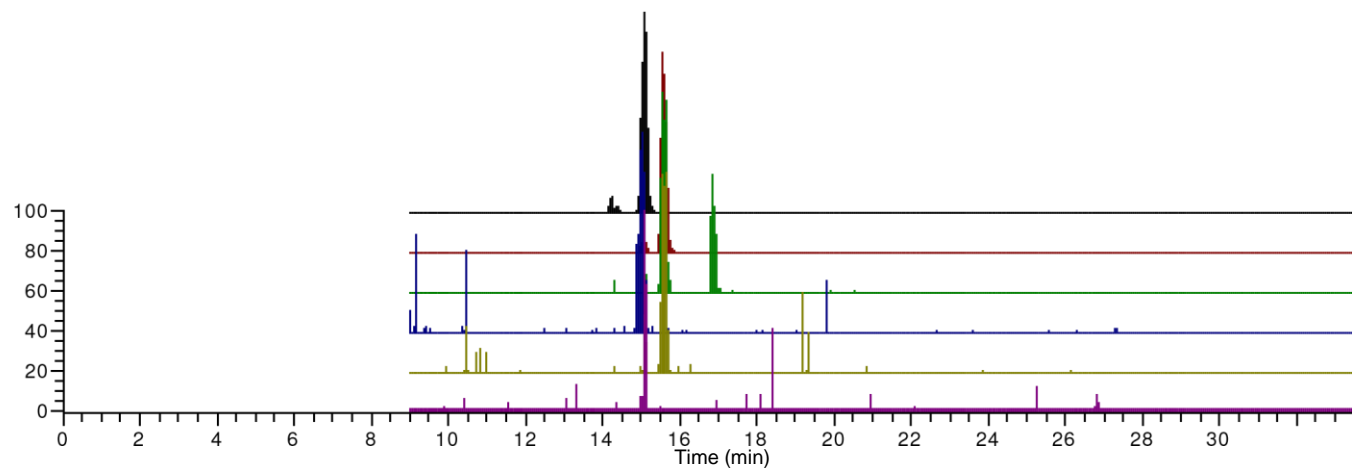

d19:2/C18:1h-HexCer  
d19:2/C18:0h-HexCer  
d19:2/C20:0h-HexCer  
d19:2/C22:0h-HexCer  
d19:2/C24:0h-HexCer  
d19:2/C26:0h-HexCer

KuWT + 1M Sorbitol: OHCer/HexCer

RT: 0.00 - 34.01

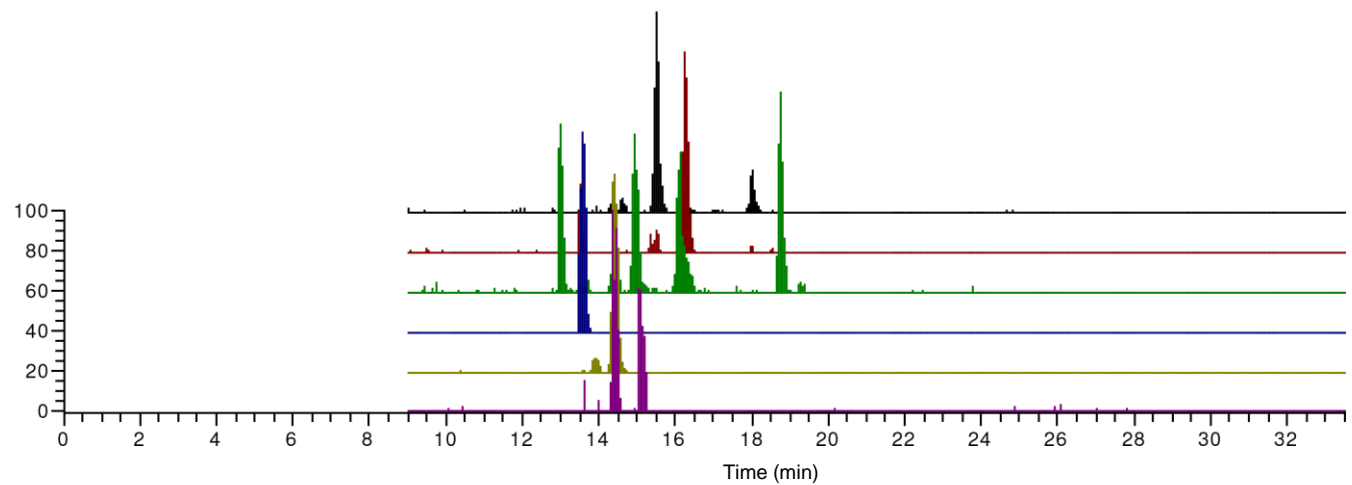

RT: 0.00 - 34.01

Time

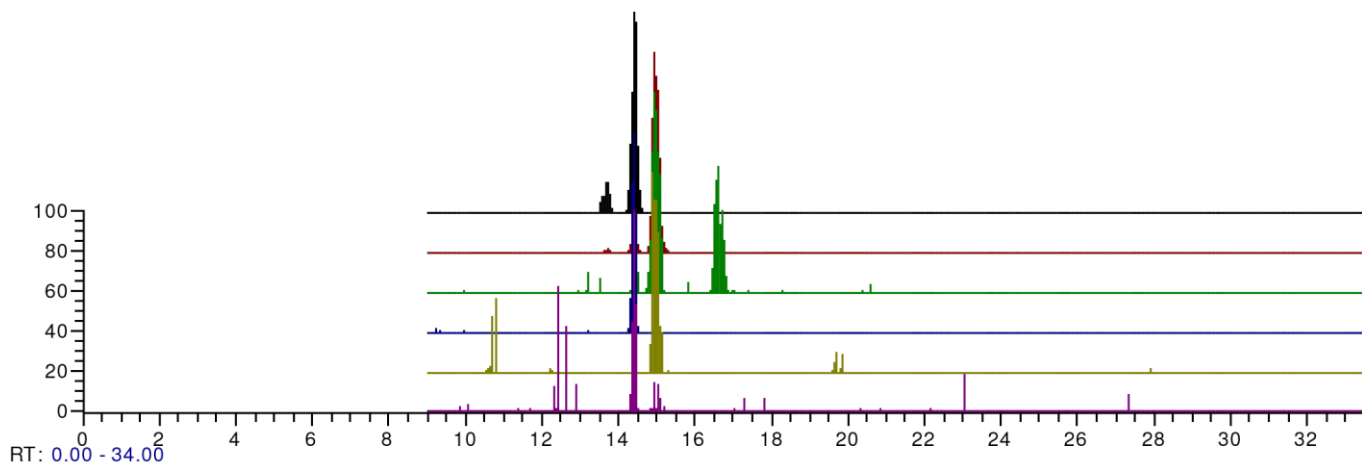

(min)  
Ku $\Delta$ schA:  
OHCer/HexCer

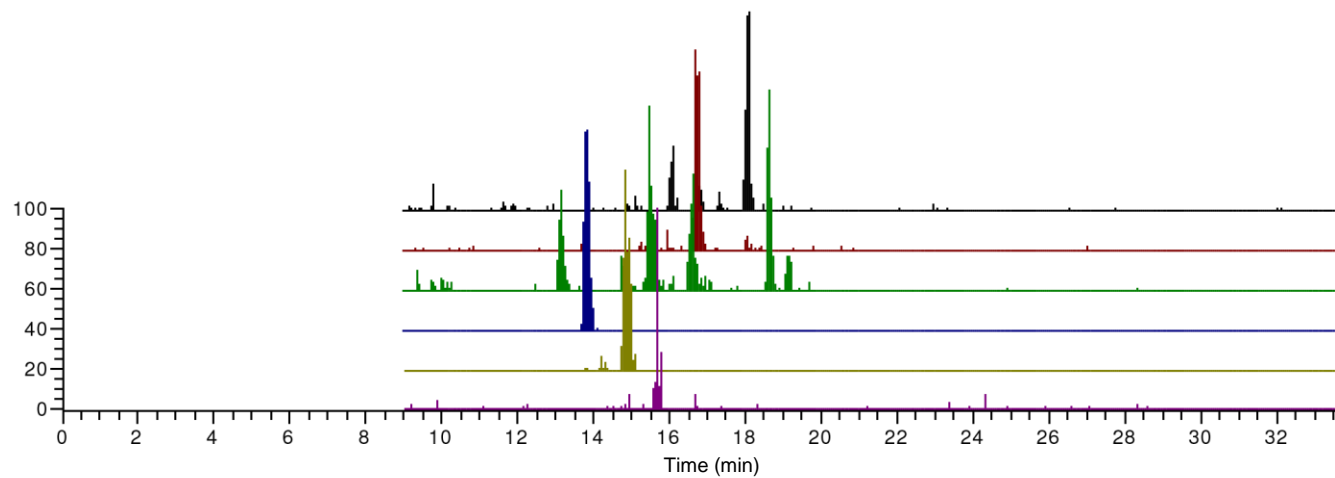

d18:2/C18:0h-Cer  
d18:1/C18:0h-Cer  
d19:2/C18:0h-Cer  
d19:2/C16:0h-HexCer  
d18:2/C18:0h-HexCer  
d18:1/C18:0-HexCer

RT: 0.00 - 34.00

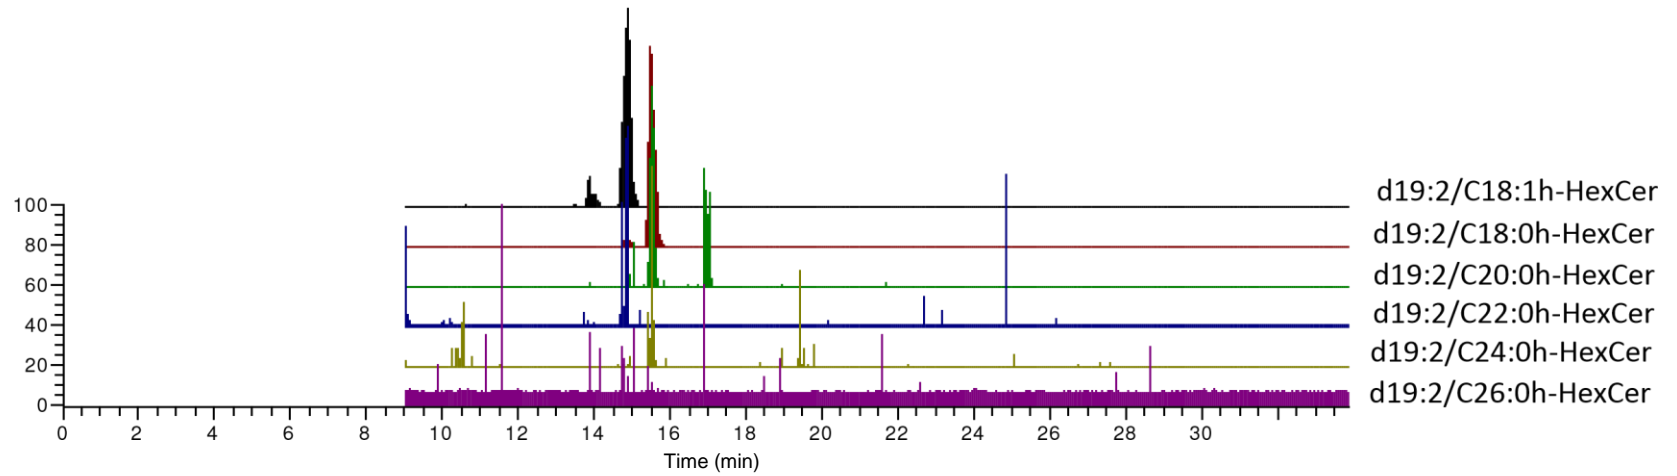

Ku $\Delta$ schA + 1M Sorbitol: OHCer/HexCer

RT: 0.00 - 34.01

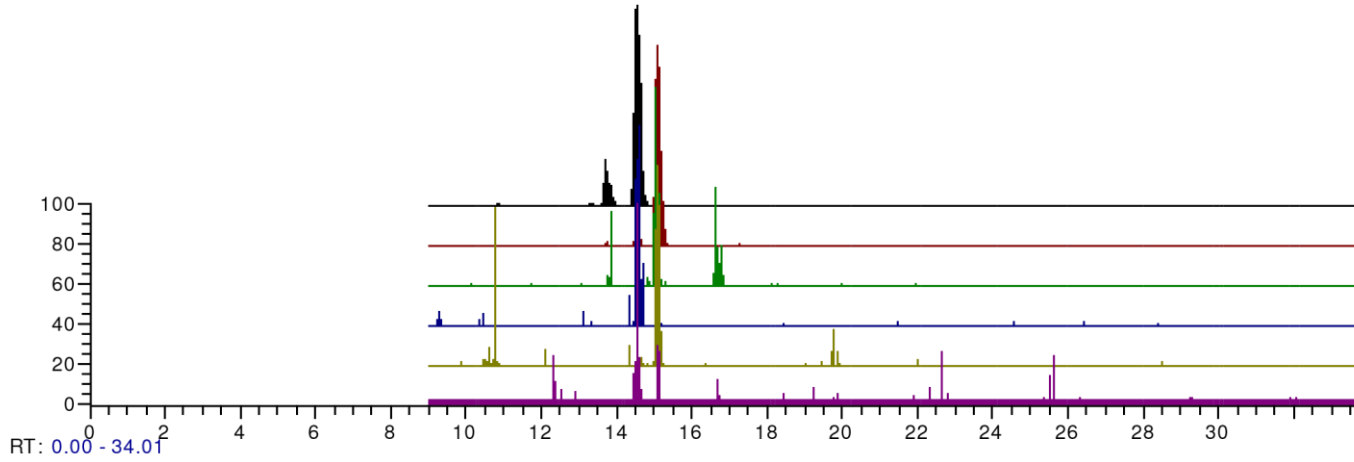

d19:2/C18:1h-HexCer  
d19:2/C18:0h-HexCer  
d19:2/C20:0h-HexCer  
d19:2/C22:0h-HexCer  
d19:2/C24:0h-HexCer  
d19:2/C26:0h-HexCer

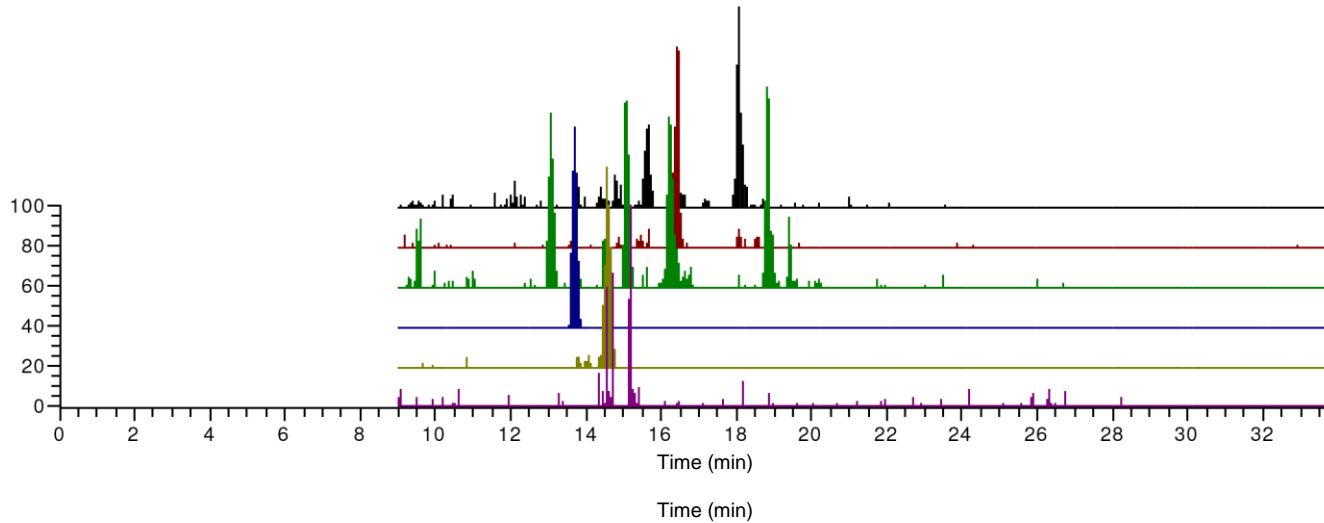

d18:2/C18:0h-Cer  
d18:1/C18:0h-Cer  
d19:2/C18:0h-Cer  
d19:2/C16:0h-HexCer  
d18:2/C18:0h-HexCer  
d18:1/C18:0-HexCer

# MRM Scanning Chromatograms of Inositolphosphorylceramide species

KuWT: IPC1

RT: 0.00 - 34.01

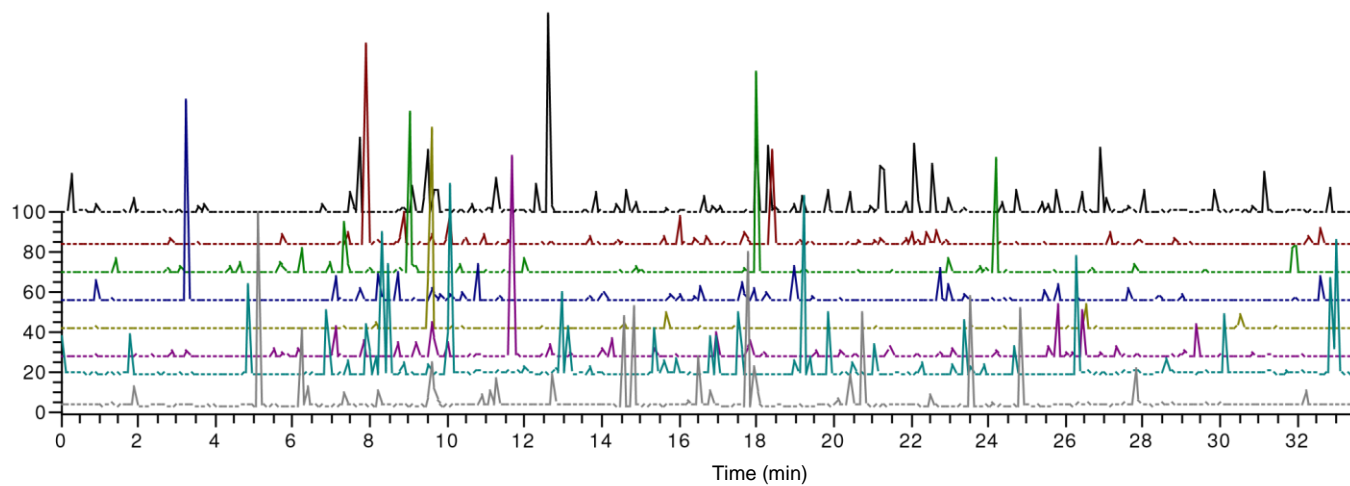



RT: 0.00 - 34.01

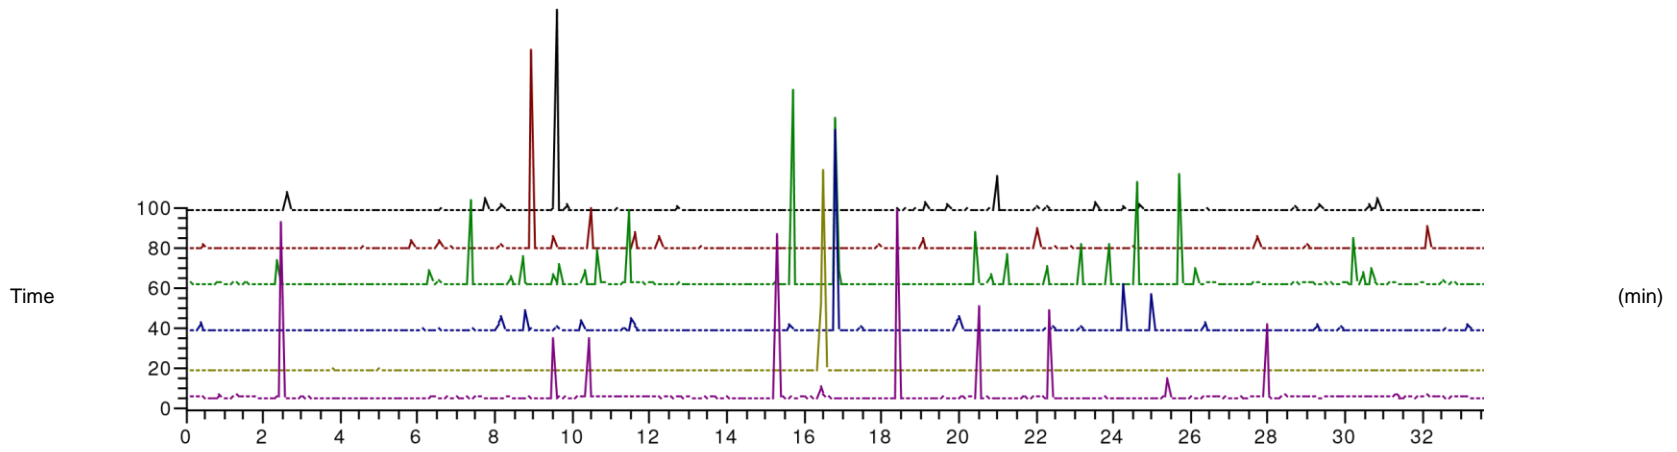

# KuWT: IPC2

RT: 0.00 - 34.08

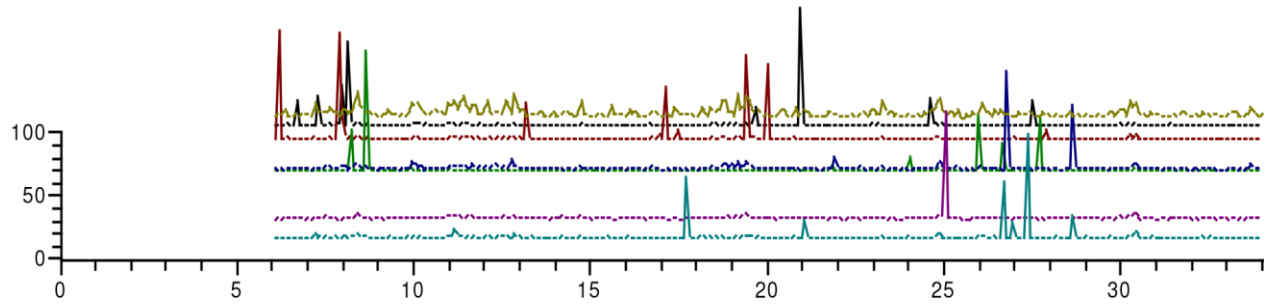

IPC-40:0;4

Time (min)

IPC-42:0;4-B IPC-42:0;5-A

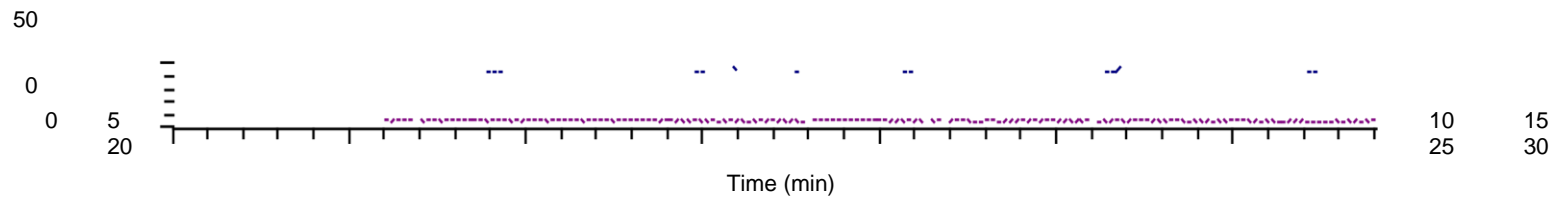

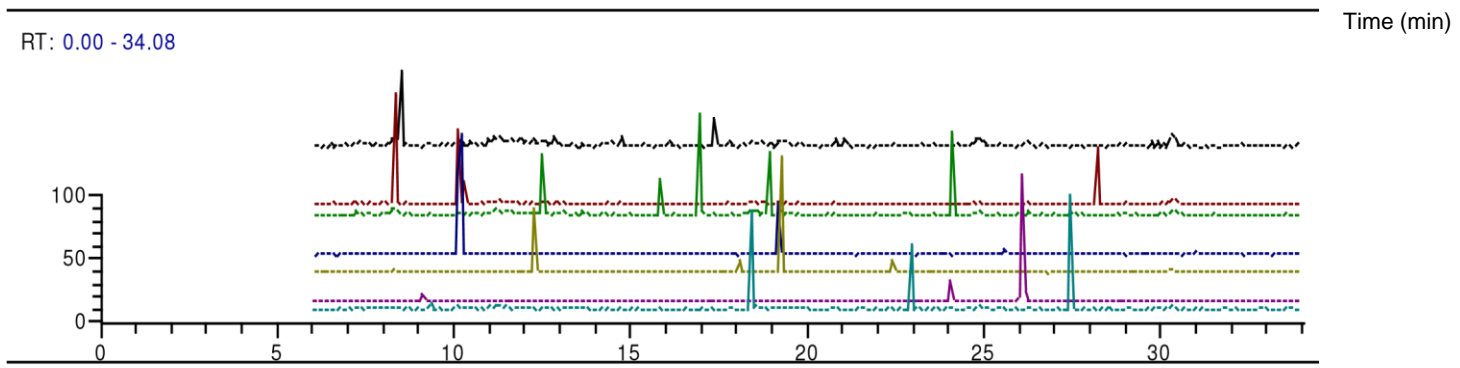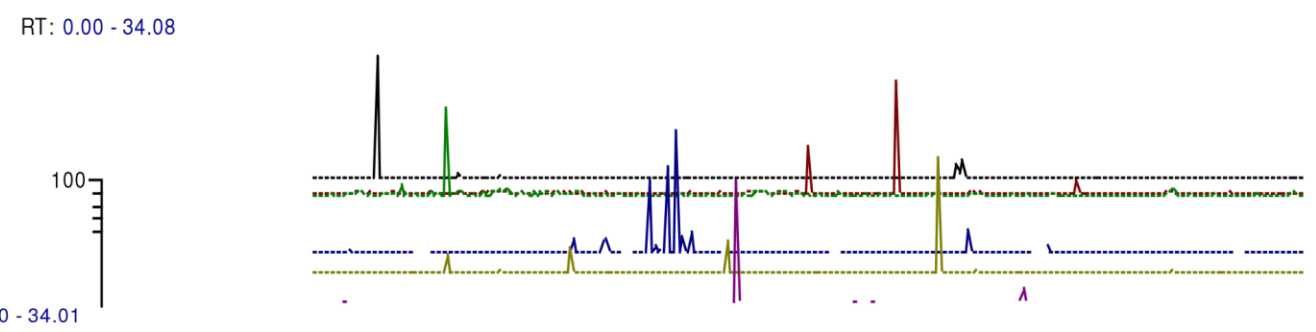

Sorbitol:

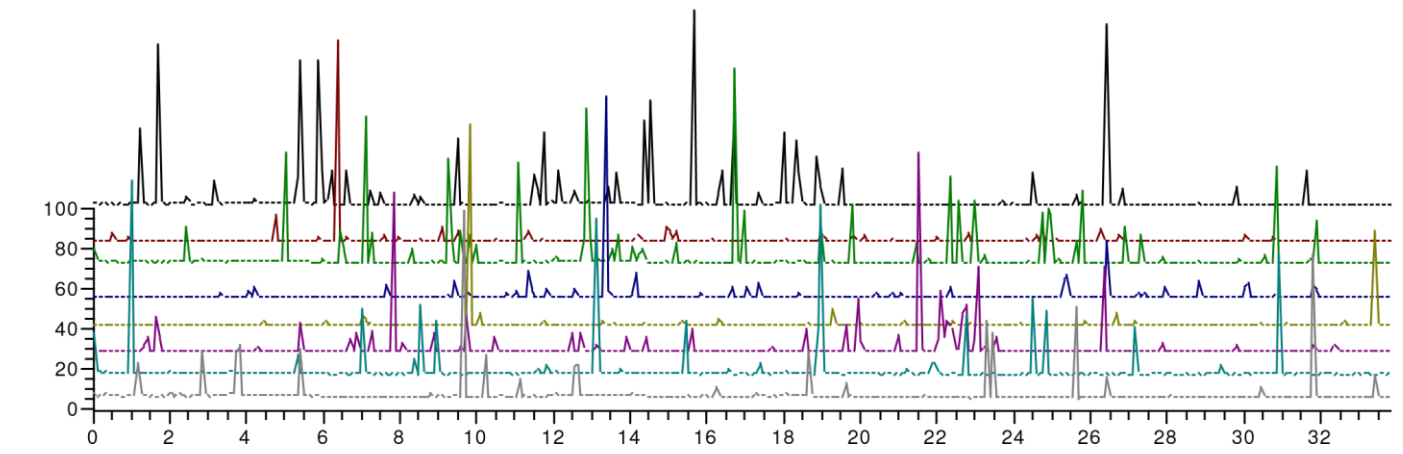

- IPC-34:0;2
- IPC-34:0;3
- IPC-36:0;2
- IPC-36:0;3
- IPC-38:0;2
- IPC-38:0;3
- IPC-40:0;2
- IPC-40:0;3

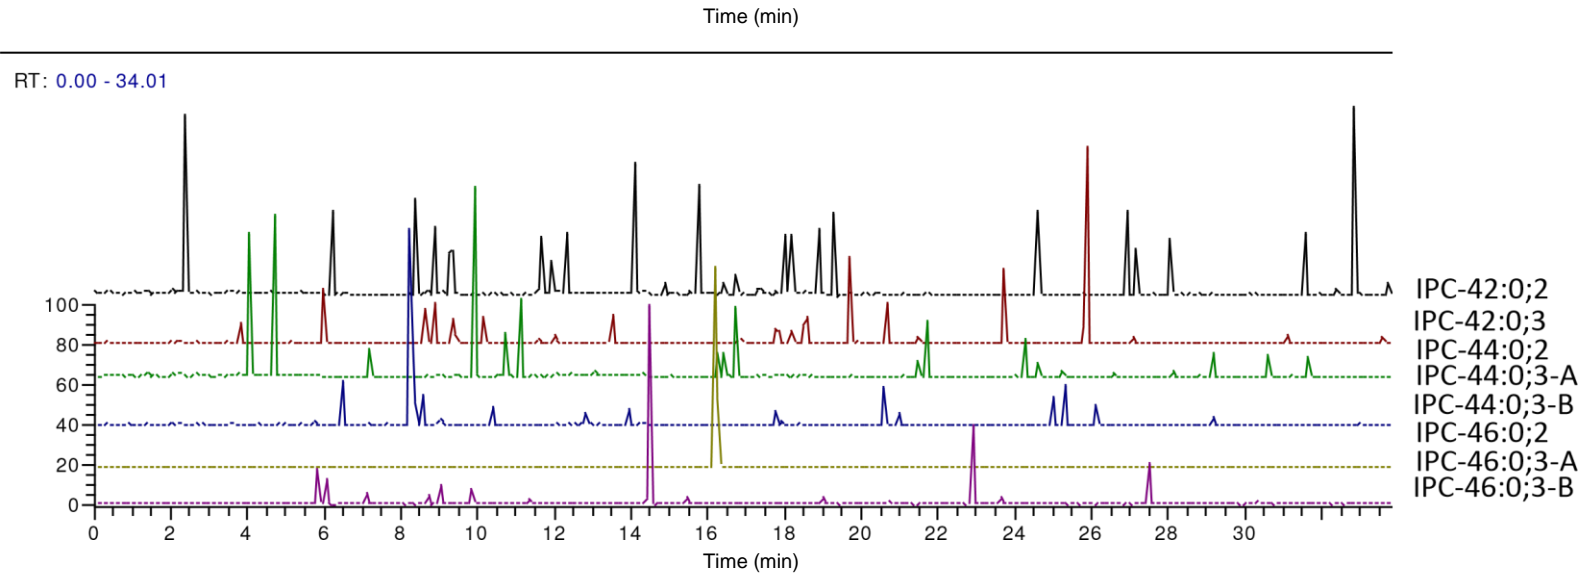

KuWT + 1M Sorbitol: IPC2

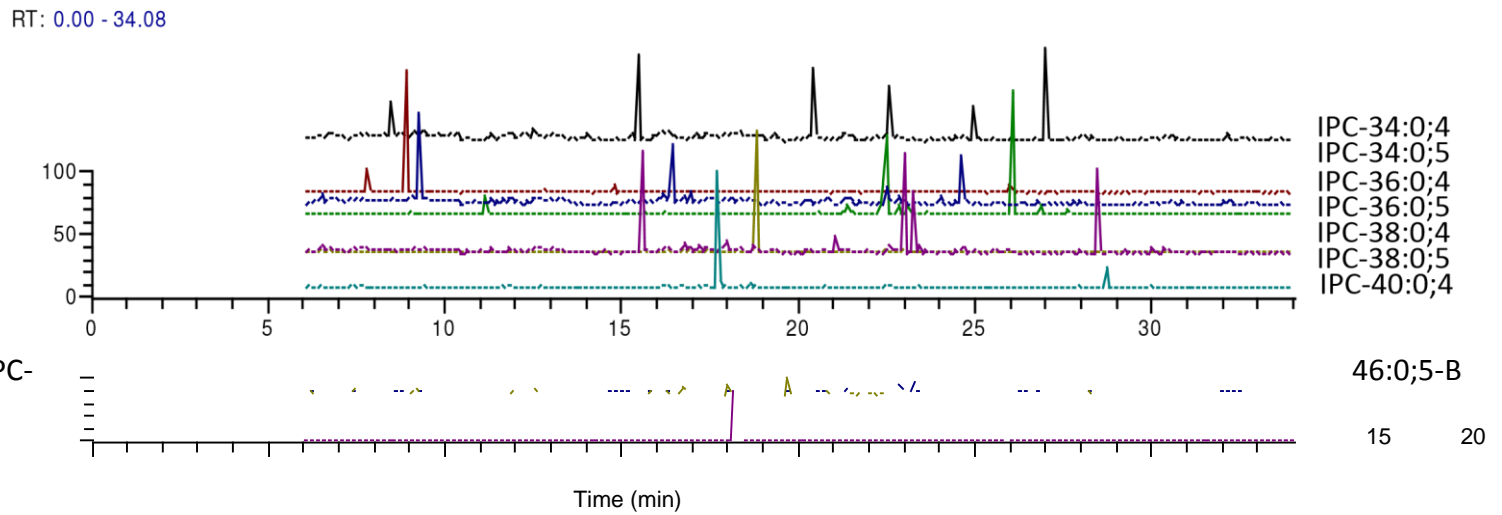

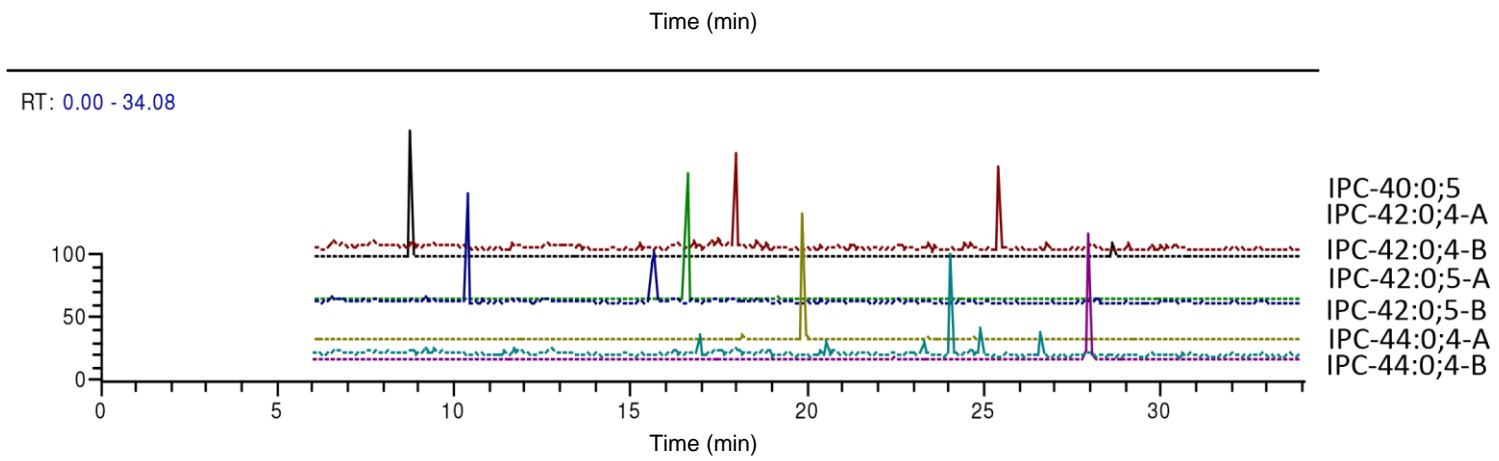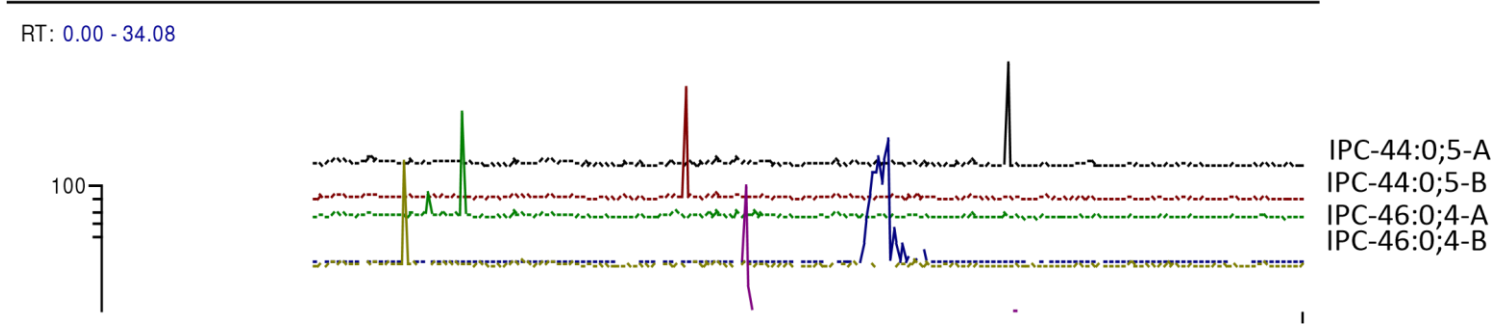

Ku $\Delta$ schA: IPC1

RT: 0.00 - 34.01

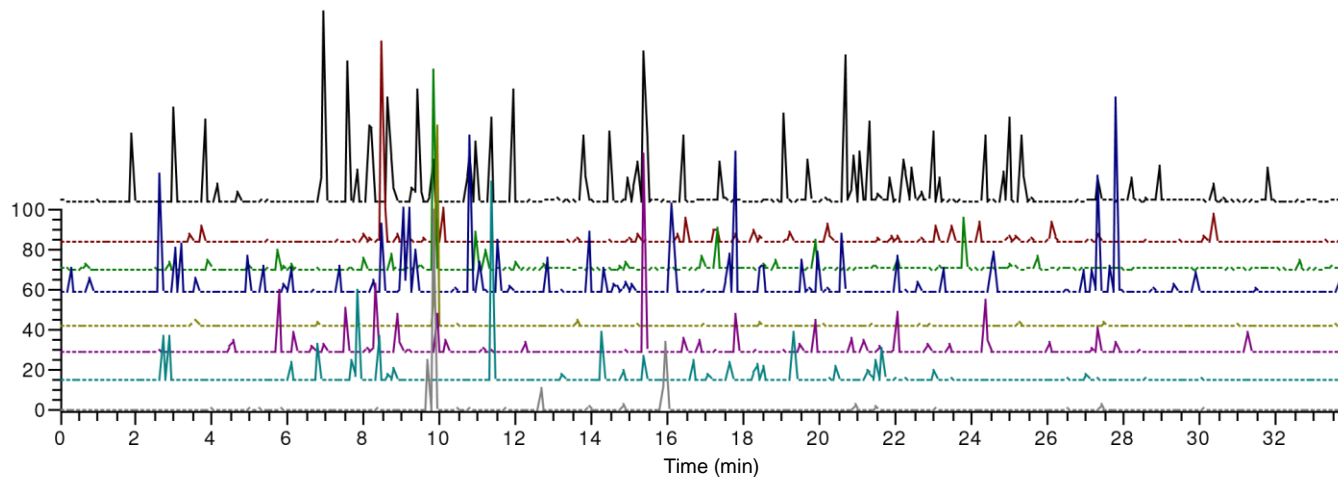

RT: 0.00 - 34.01

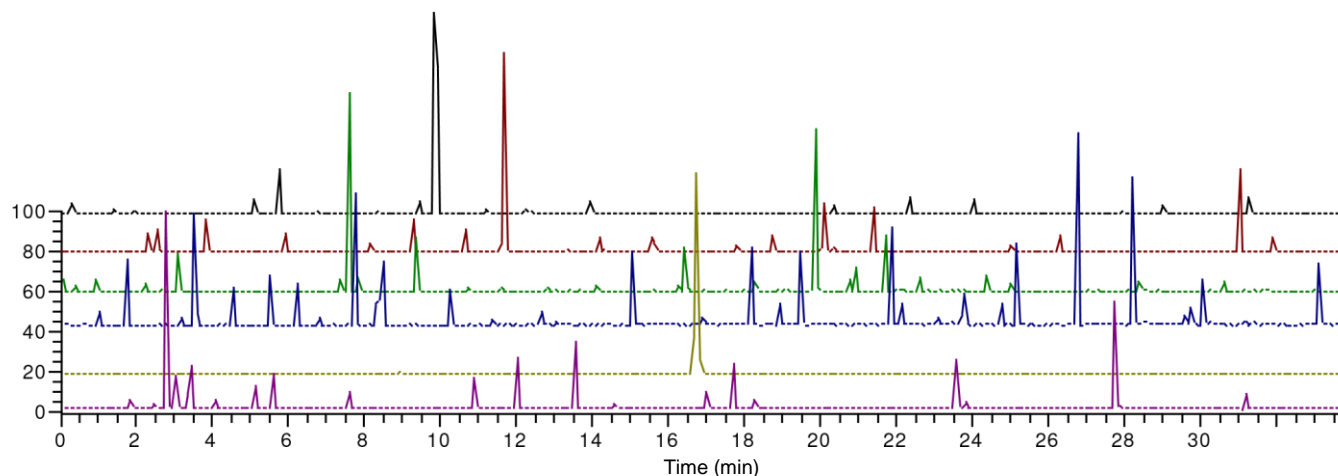

IPC-46:0;5-A IPC-

46:0;5-B

50  
0  
0 5 10  
25 30

15 20

Time (min)

# KuΔschA: IPC2

RT: 0.00 - 34.08

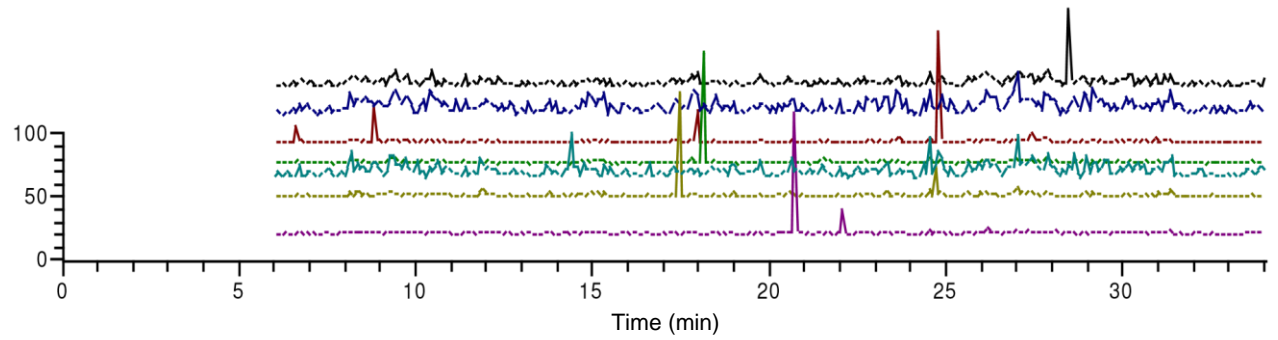

IPC-34:0;4  
IPC-34:0;5  
IPC-36:0;4  
IPC-36:0;5  
IPC-38:0;4  
IPC-38:0;5  
IPC-40:0;4

RT: 0.00 - 34.08

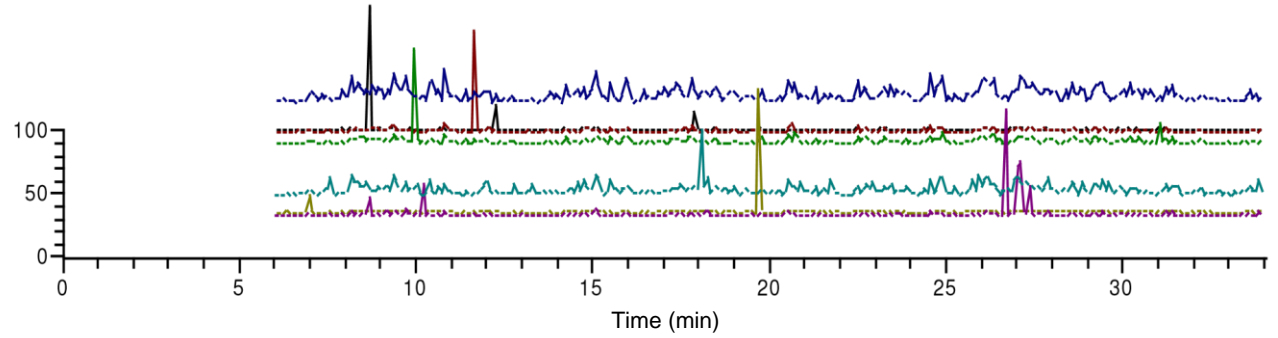

IPC-40:0;5  
IPC-42:0;4-A  
IPC-42:0;4-B  
IPC-42:0;5-A  
IPC-42:0;5-B  
IPC-44:0;4-A  
IPC-44:0;4-B

RT: 0.00 - 34.08

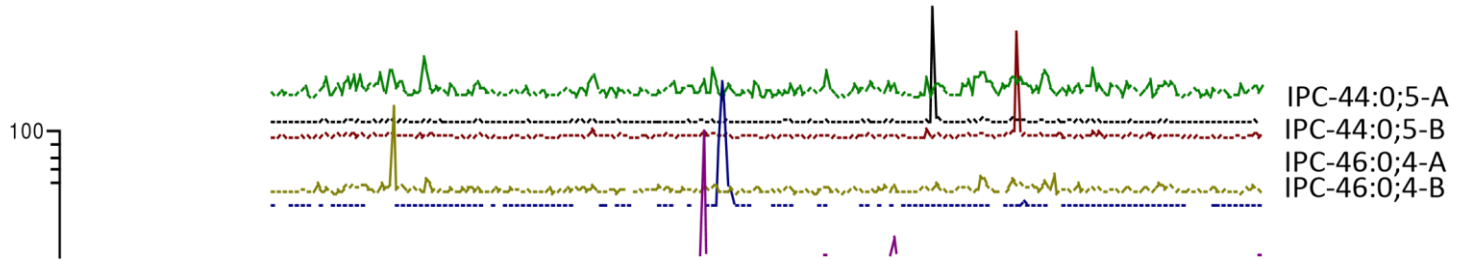

KuΔschA + 1M Sorbitol: IPC1

RT: 0.00 - 34.01

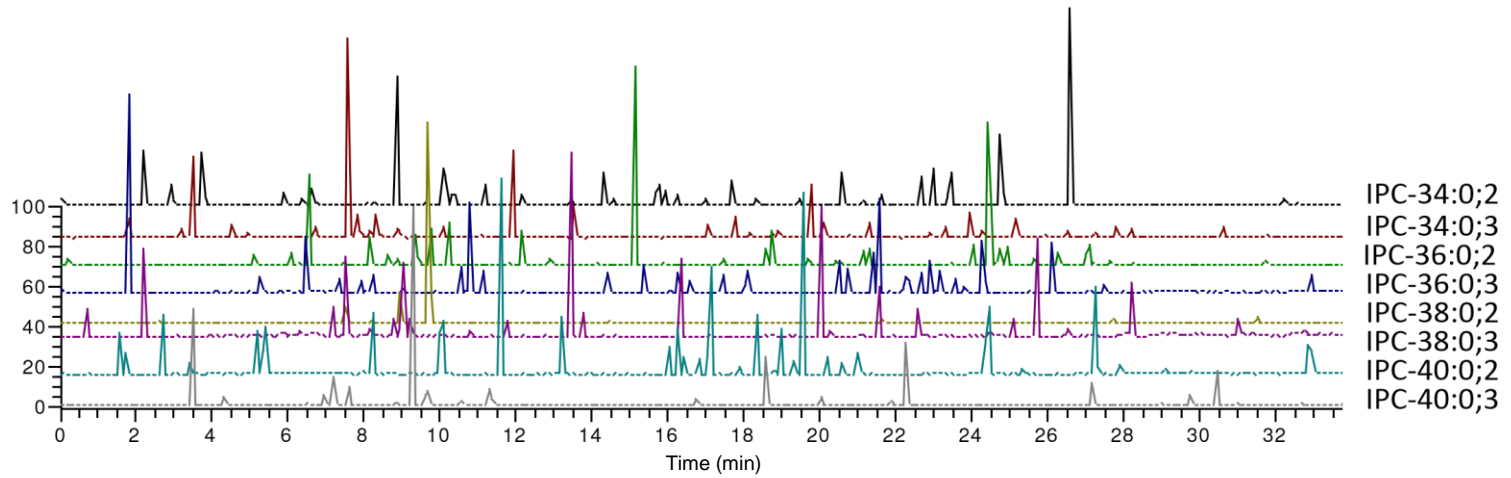

50

IPC-46:0;5-A IPC-

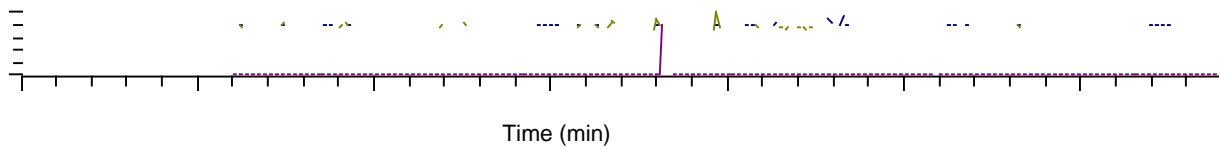

46:0;5-B

15 20



RT: 0.00 - 34.01

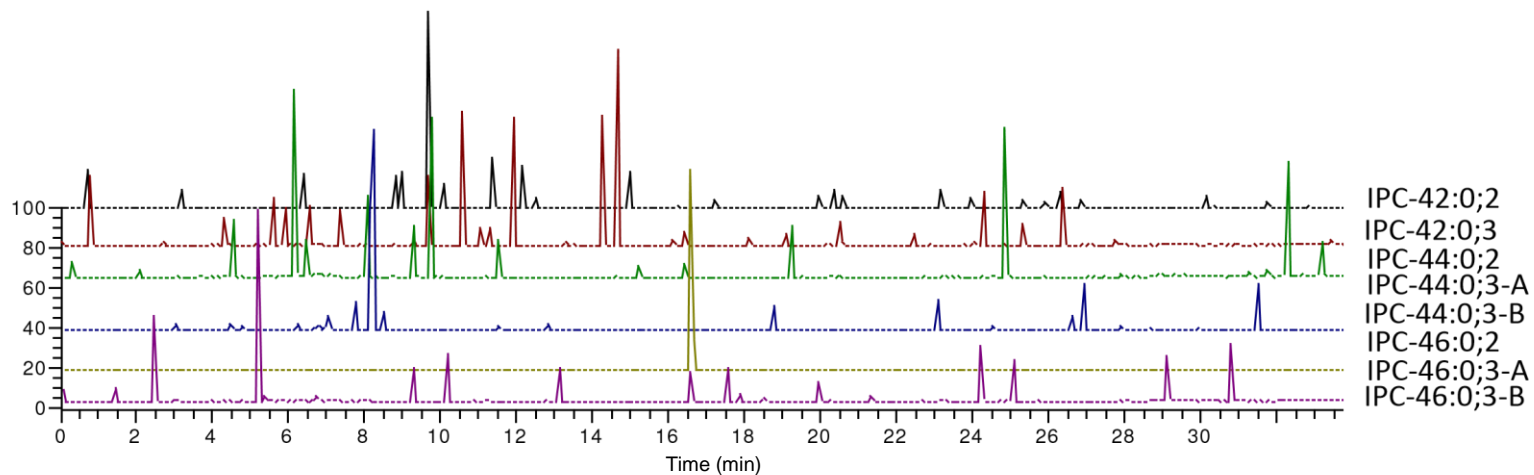

Ku $\Delta$ schA + 1M Sorbitol: IPC2

RT: 0.00 - 34.08

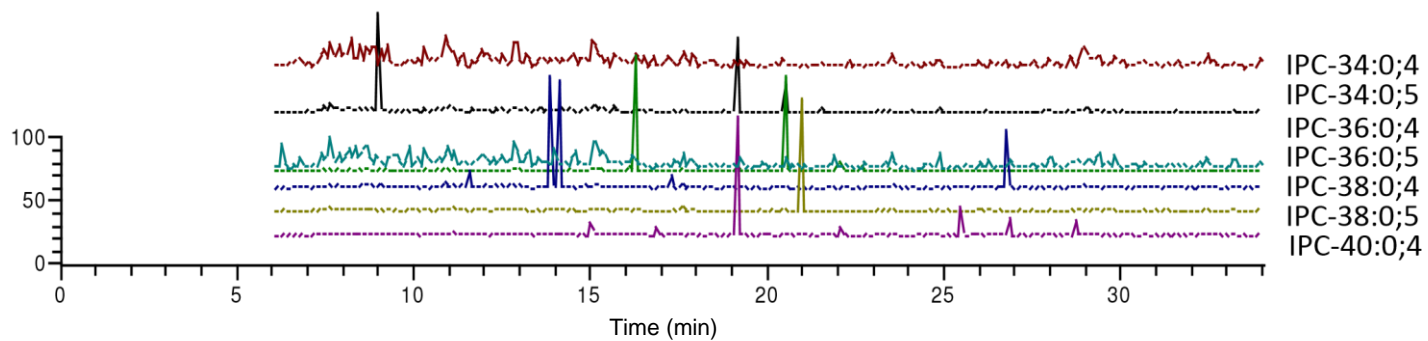

RT: 0.00 - 34.08

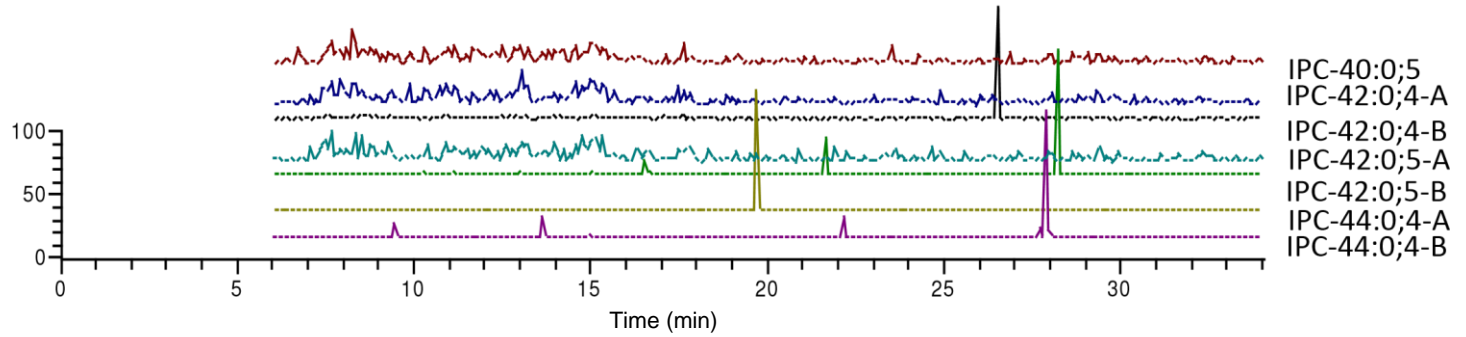

RT: 0.00 - 34.08

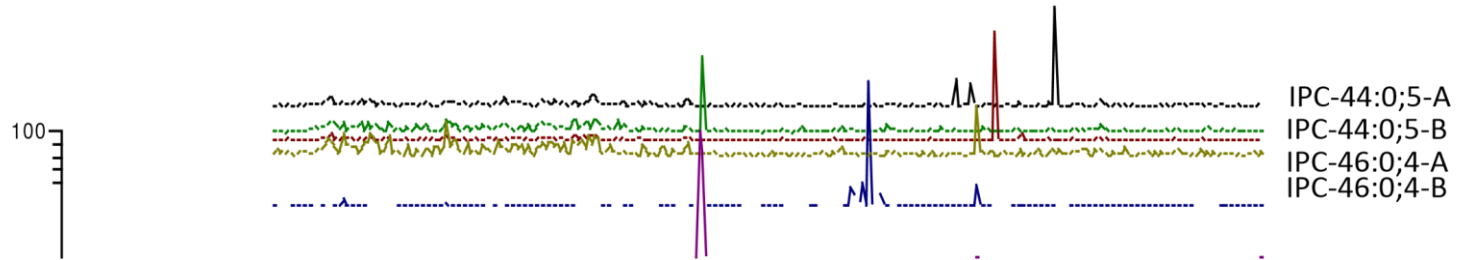

## MRM Scanning Chromatograms of Mannosylinositolphosphorylceramide species

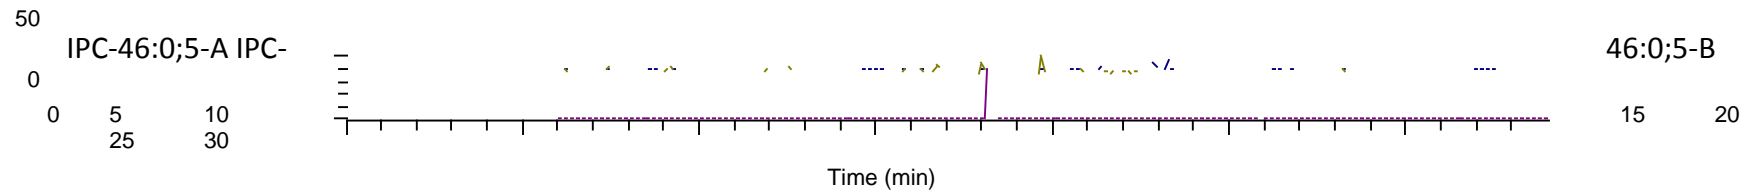

# KuWT: MIPC1

RT: 0.00 - 34.01

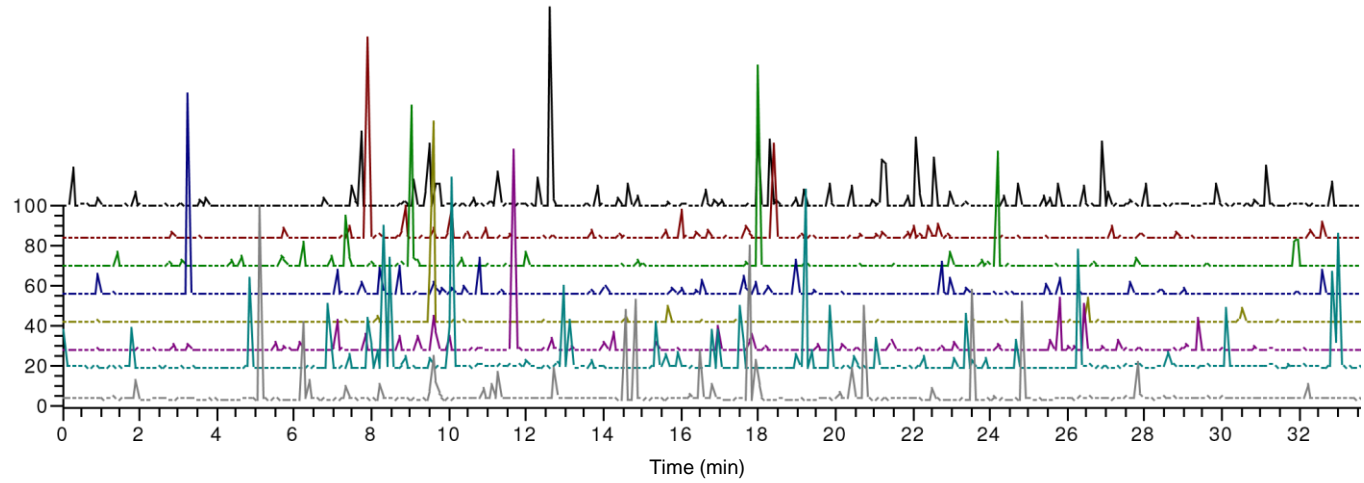

RT: 0.00 - 34.01

Time (min)  
KuWT:

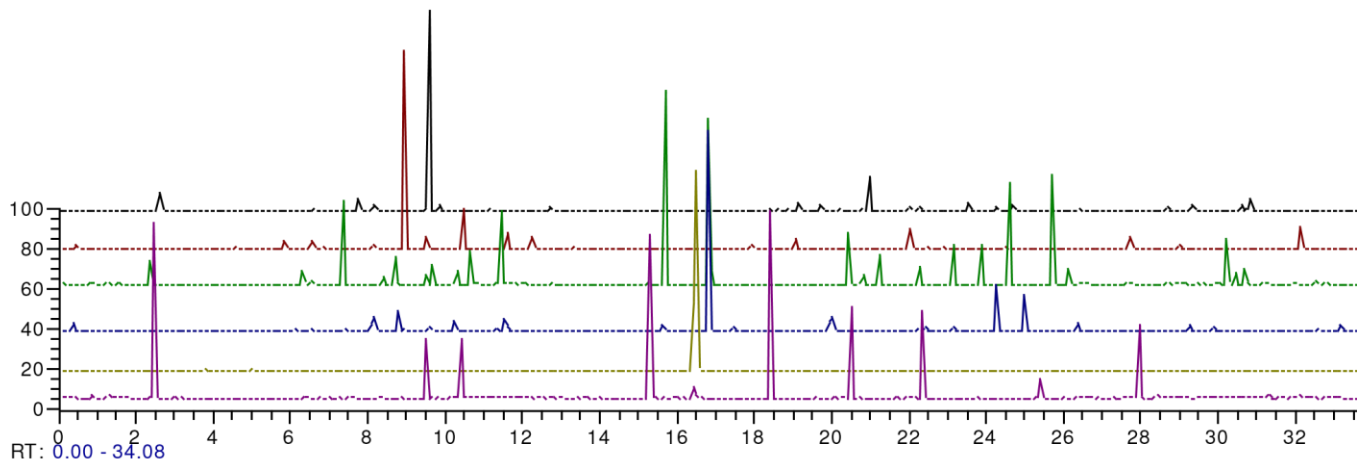

MIPC2

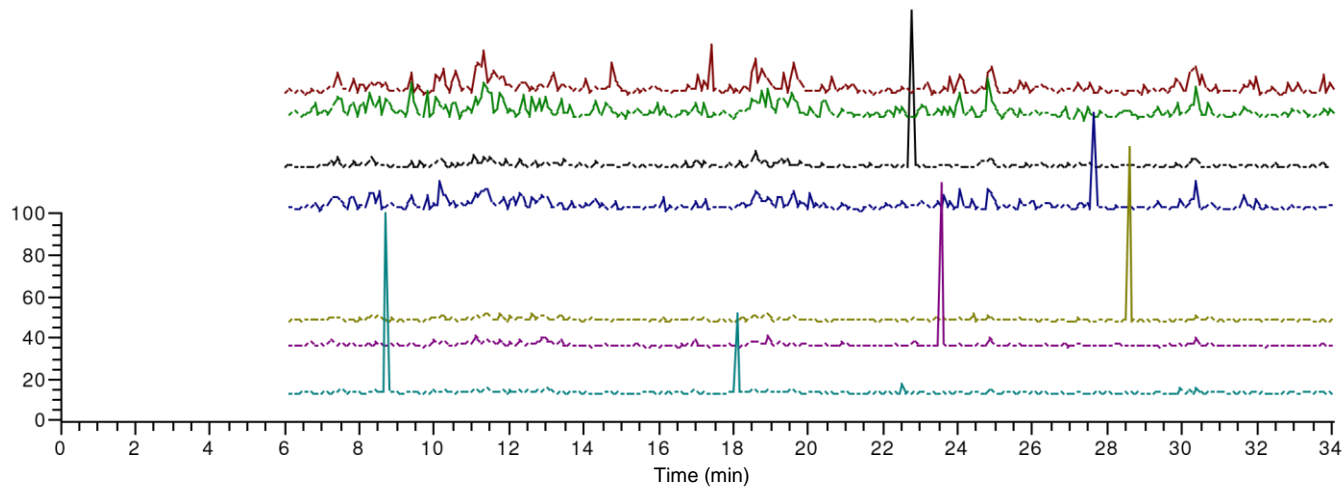

MIPC-34:0;4

MIPC-34:0;5

MIPC-36:0;4

MIPC-36:0;5

MIPC-38:0;4

MIPC-38:0;5

MIPC-40:0;4

0 2 4 6 8 10

RT: 0.00 - 34.08

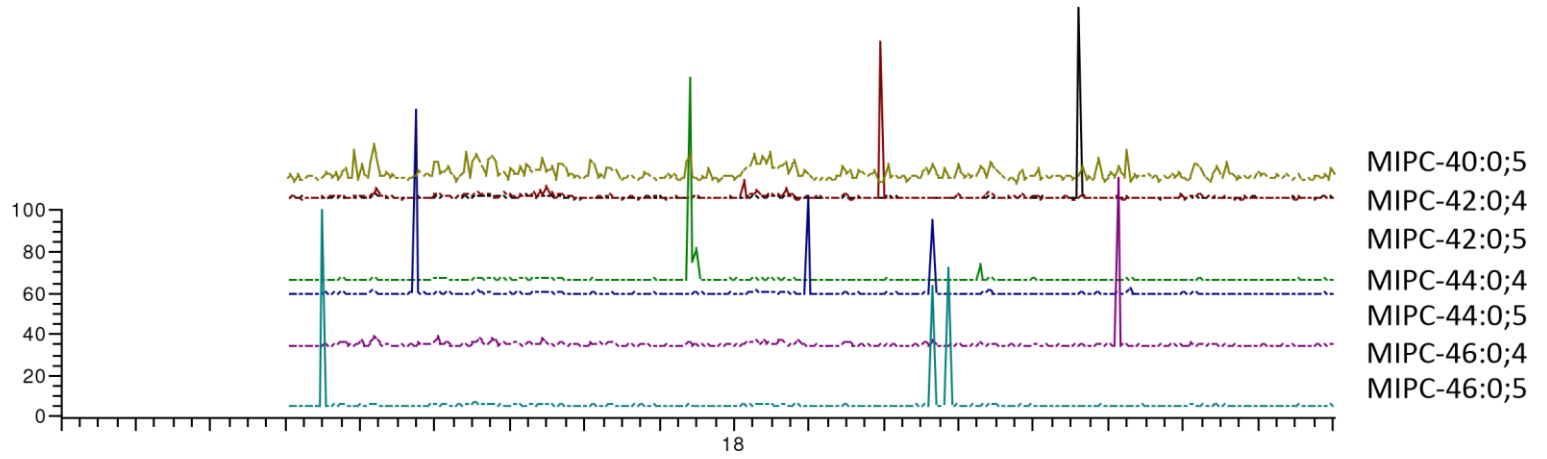

KuWT + 1M Sorbitol: MIPC1

0 2 4 6 8 10 12 14 16 20 22 24 26 28 30 32 34  
Time (min)

RT: 0.00 - 34.01

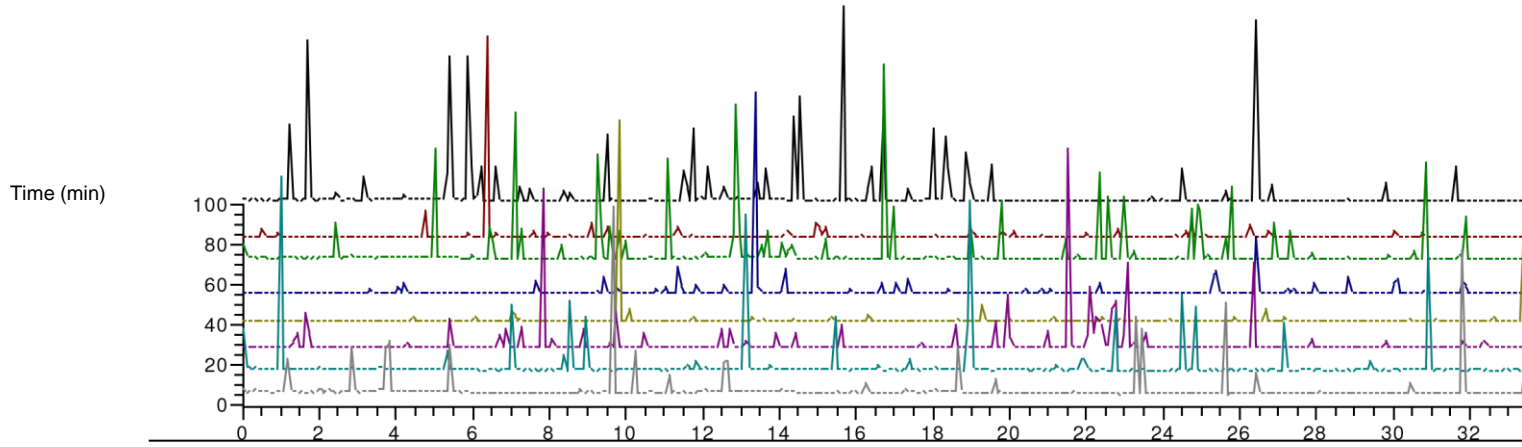

RT: 0.00 - 34.01

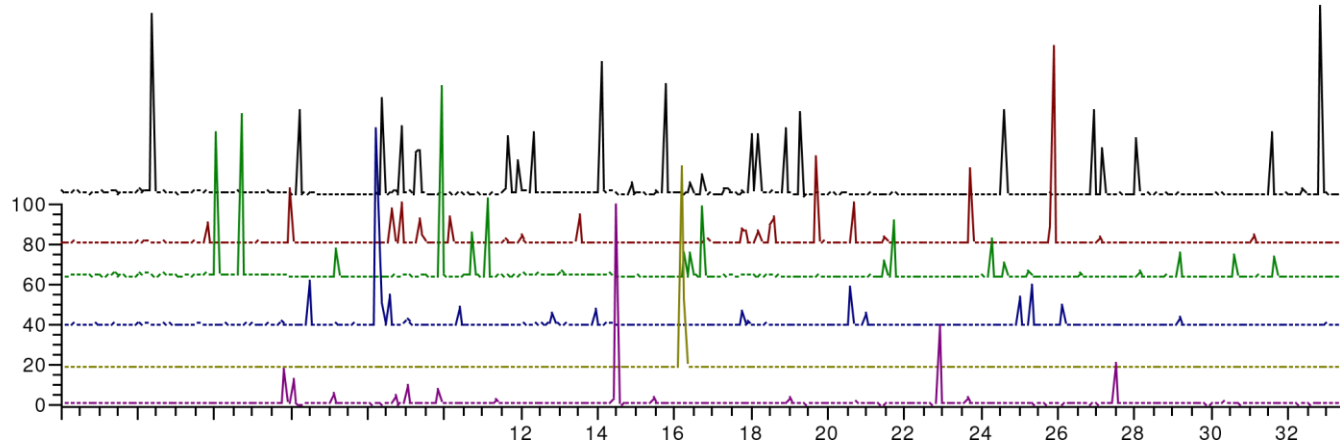

1M

MIPC2

KuWT +

Sorbitol:

0 2 4 6 8 10

RT: 0.00 - 34.08

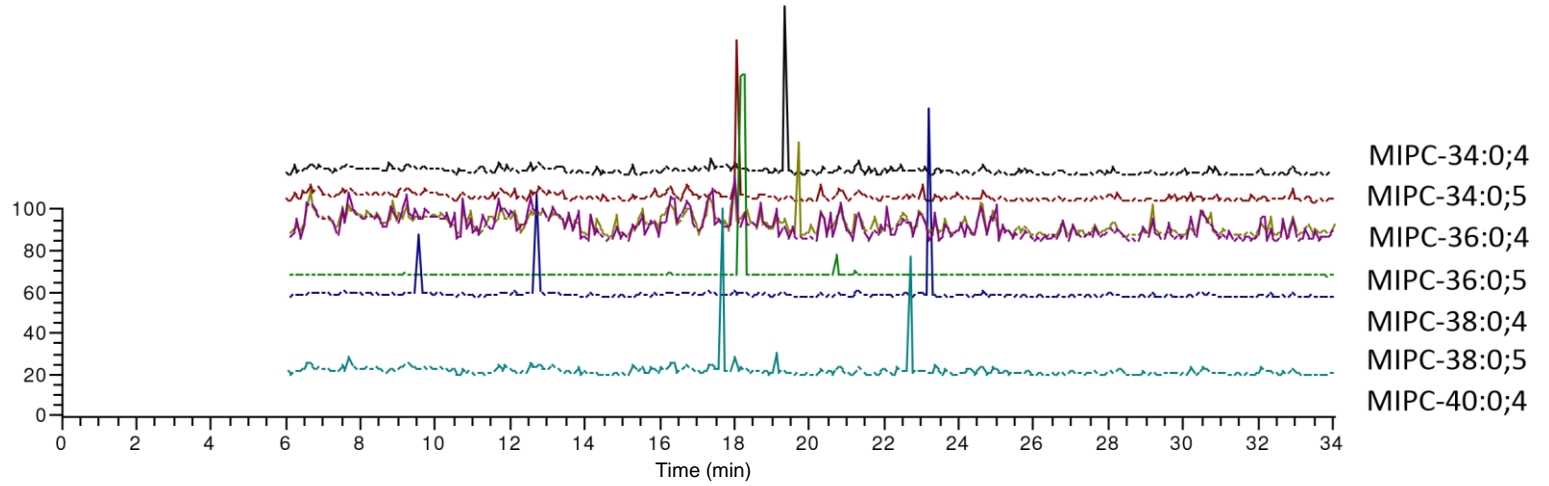

RT: 0.00 - 34.08

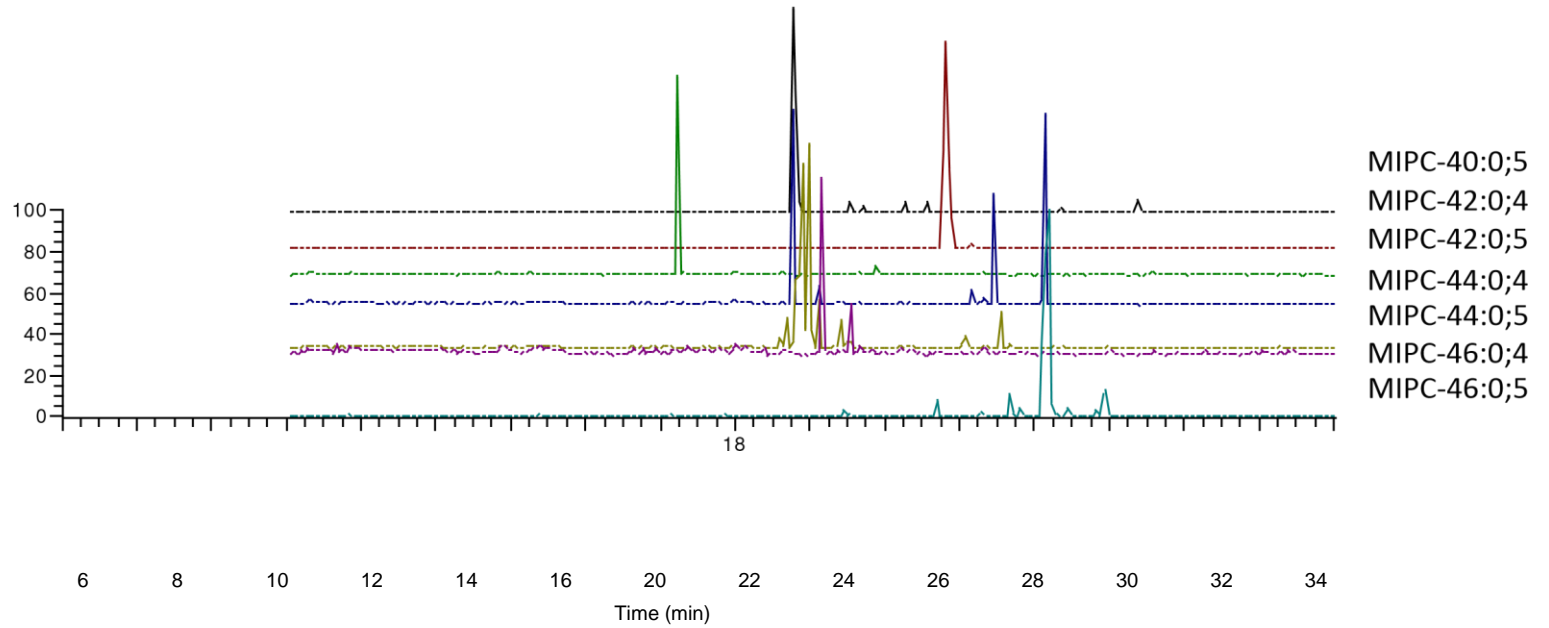

RT: 0.00 - 34.01

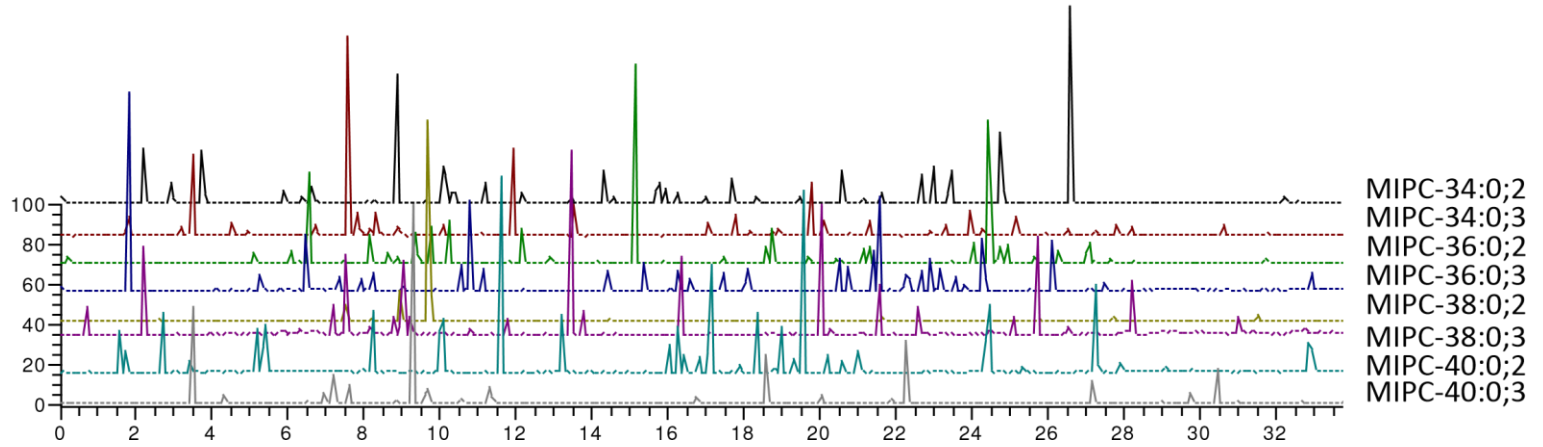

MIPC-34;0;2  
MIPC-34;0;3  
MIPC-36;0;2  
MIPC-36;0;3  
MIPC-38;0;2  
MIPC-38;0;3  
MIPC-40;0;2  
MIPC-40;0;3

Ku $\Delta$ schA: MIPC1

Time (min)



KuΔ

RT: 0.00 - 34.01

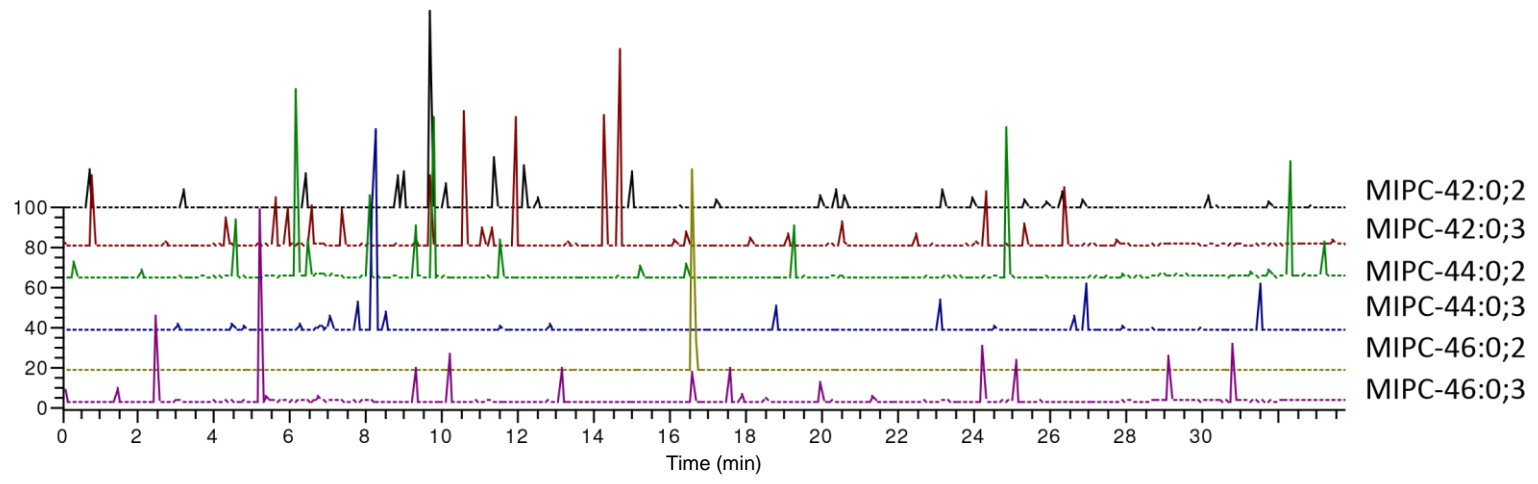

schA: MIPC2

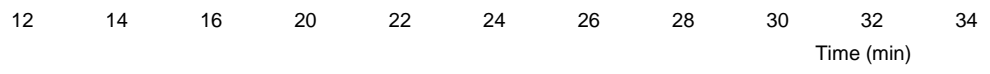

KuΔ

RT: 0.00 - 34.08

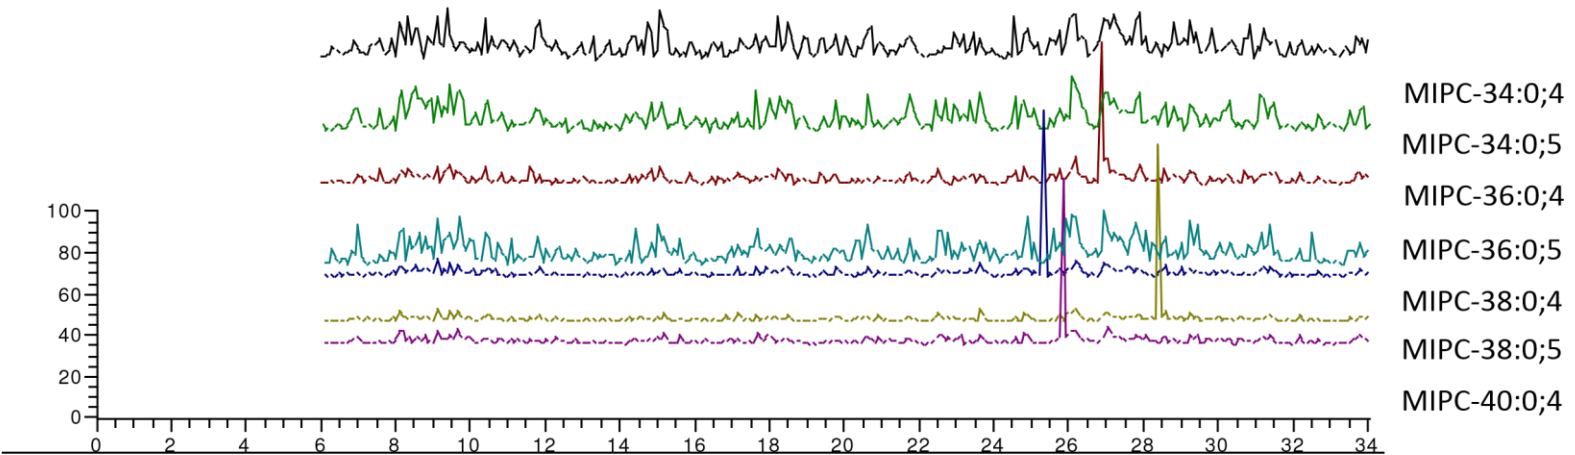

RT: 0.00 - 34.08

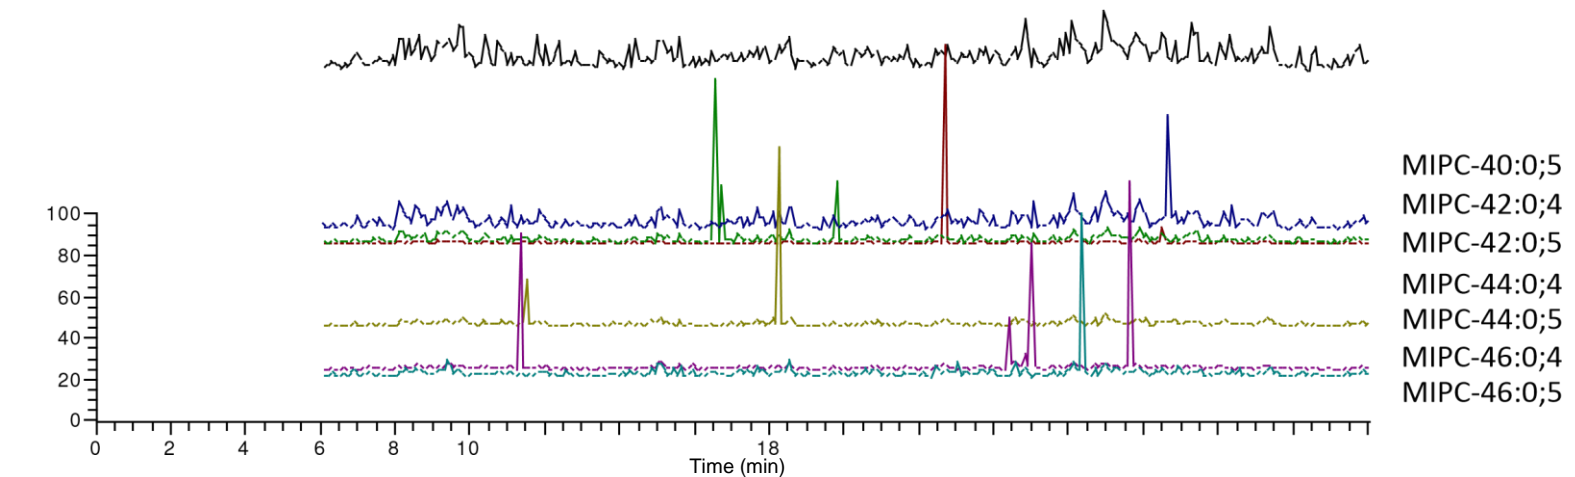

KuΔ

schA + 1M Sorbitol: MIPC1

RT: 0.00 - 34.01

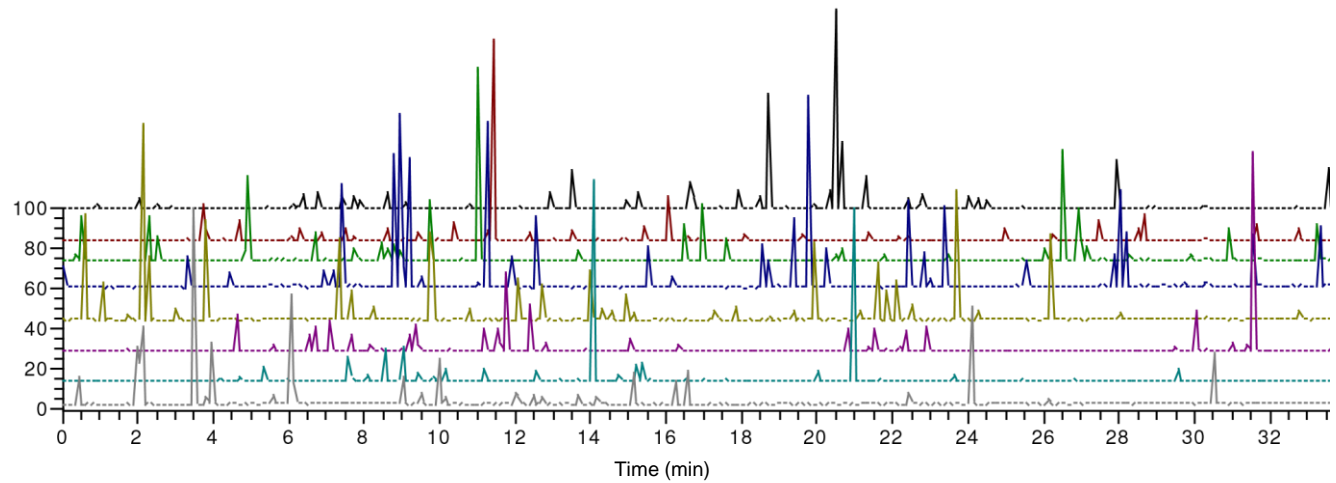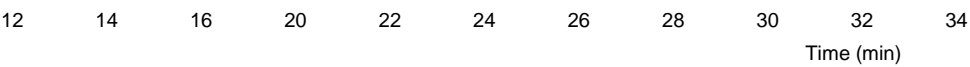

KuΔ

RT: 0.00 - 34.01

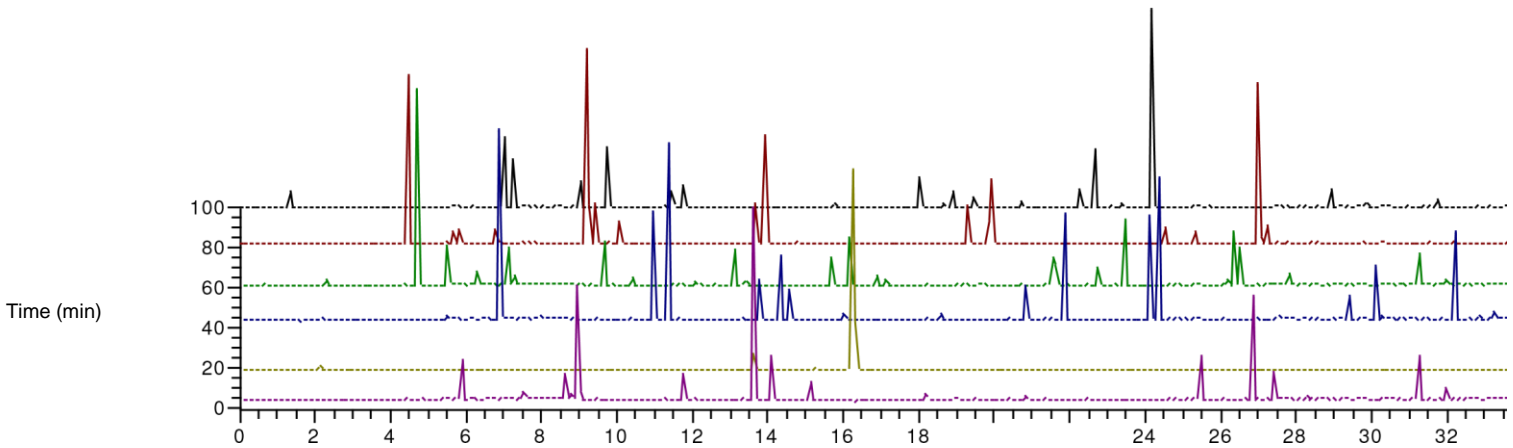

Ku $\Delta$

schA + 1M Sorbitol: MIPC2

RT: 0.00 - 34.08

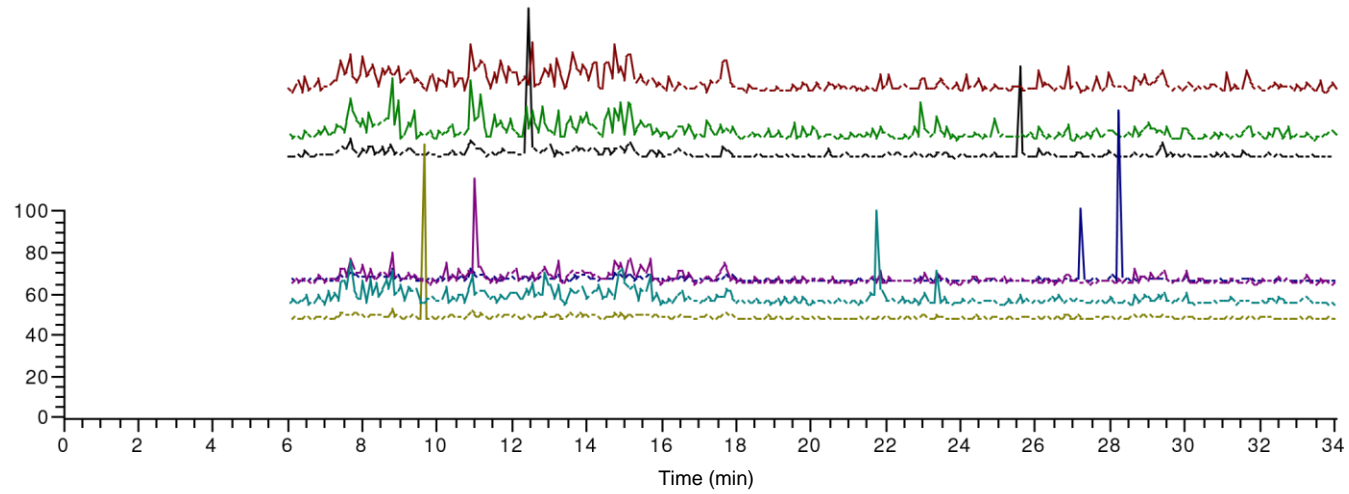

Ku $\Delta$

RT: 0.00 - 34.08

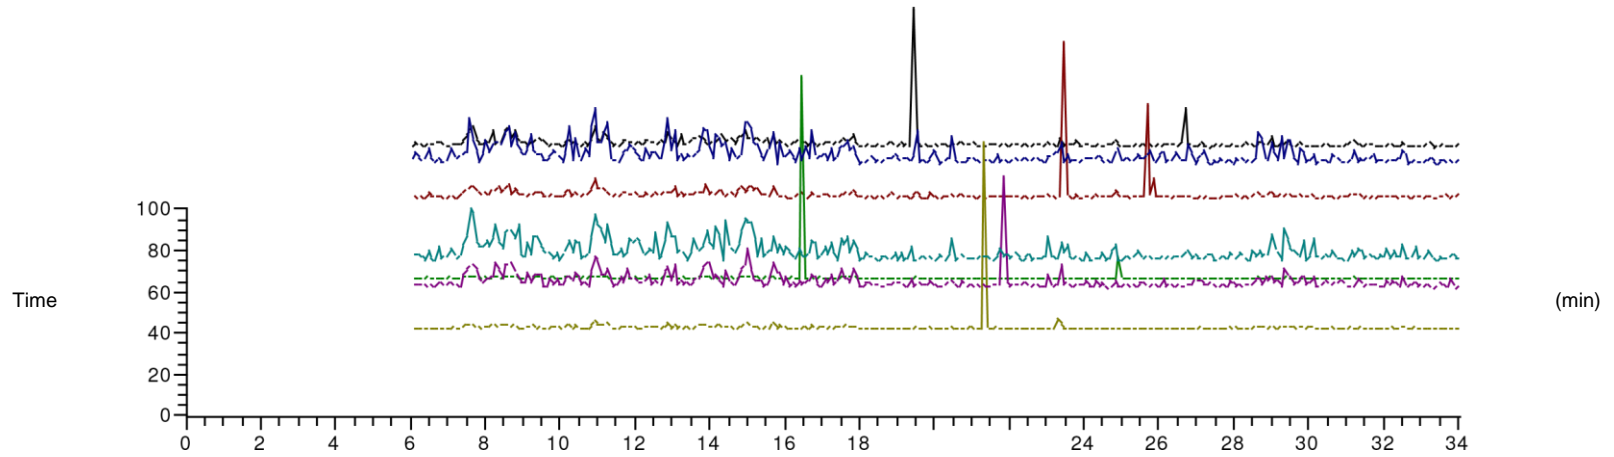

Supplement: NIHMS833558-supplement-S5.pdf [file NIHMS833558-supplement-S5.pdf]
