# Supplementary material
Source: PubMed Central journal article supplement (PMC5207228)
Supplement: NIHMS833558-supplement-S1.pdf [file NIHMS833558-supplement-S1.pdf]

A.

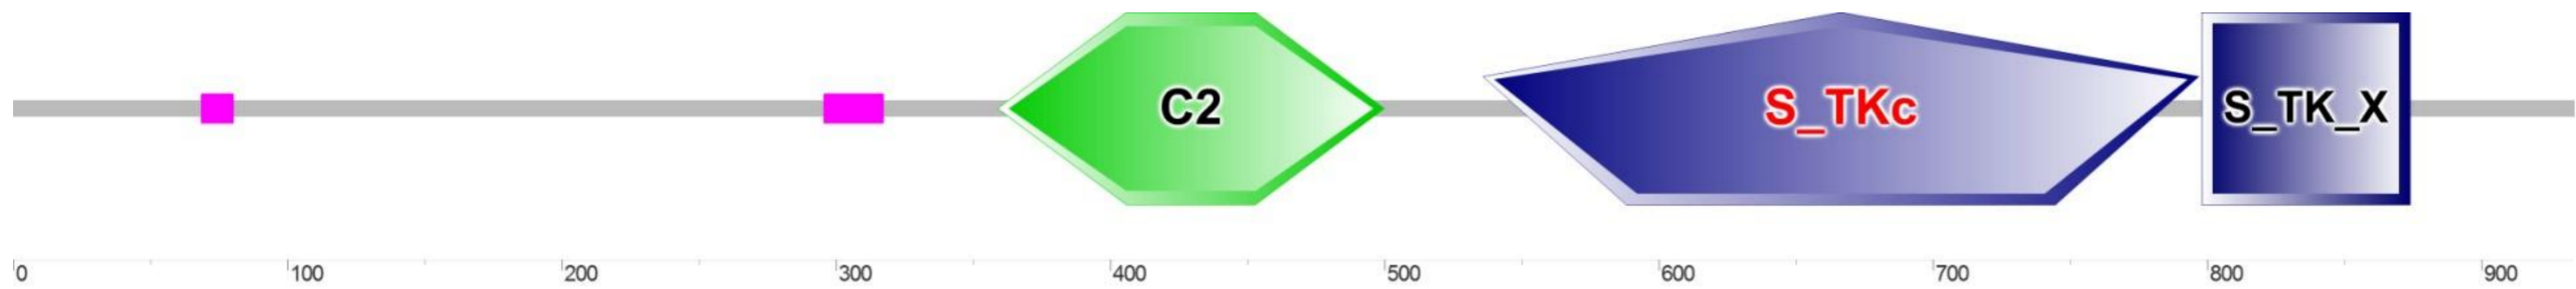

B.

```

Sch9: 305 SKRSSNSSS--GSSNGPKNDSSHPiWHHKTTf---DVLGSHSELDISVYDAAHDHMFLGQ 359
      S++SSN+S+ G      K+ + P W+H+ T      DVLG SE+D+SVYD +   FLG
SchA: 424 SRQSSNNSAMEGHDFRGKSPVTDPHWNHEATLYNSDVLGEESEIDVSVYDRNNQEAF LGH 483

Sch9: 360 VRLYPMIHNLAHASQHQWHSLKPR-VIDEVVSGDILIKWTKYKQTKKRHYGPQDFEVLRL 418
      VRL +   H+   W L R D +SG+I ++   +++T+K+ GP DF++L+L+
SchA: 484 VRLSLNLKE-DHSRLEGWFPLSARGAGDSQISGEIHLEMLFEKTEKKQVGPNDFQILKLI 542

Sch9: 419 GKGTFGQVYQVKKKDTQRIYAMKVLSKKVIVKKNEIAHTIGERNILVTTASKSSPFIVGL 478
      GKGTFGQVYQV KKDT RIYAMKVLSKKVI++K E+AHT+GERNILV TA +SPFIVGL
SchA: 543 GKGTFGQVYQVMKKDTHRIYAMKVLSKKV I IQKKEVAHTLGERNILVRTAMAASPFIVGL 602

Sch9: 479 KFSFQTPDLYLVTDYMSGGELFWHLQKEGRFSEDRAKFYIAELVLALEHLHDNDIVYRD 538
      KFSFQTPDLYLVTDYMSGGELFWHLQKEGRF E RAKFYIAEL+LAL+HLHD+DIVYRD
SchA: 603 KFSFQTPDLYLVTDYMSGGELFWHLQKEGRFQEARAKFYIAELILALQHLHDH DIVYRD 662

Sch9: 539 LKPENILLDANGNIALCDFGLSKADLK--DRTNTFCGTTEYLAPELLLDETGYTKMVDFW 596
      LKPENILLDANG+IALCDFGLSKA+L   D TNTFCGTTEYLAPE+LLDE GYTKMVDFW
SchA: 663 LKPENILLDANGHIALCDFGLSKANLTQNDTTNTFCGTTEYLAPEVLLDEQGYTKMVDFW 722

Sch9: 597 SLGVLI FEMCCGWS PFFAENNQKMYQKIAFGKVKFPRDVLSQEGRSFVKGLLNRNPKHRL 656
      SLGVL+FEMCCGWS PF+AE+ Q+MY+ IAFGKV+FPRD LS EGR+FVKGLLNRNPKHRL
SchA: 723 SLGVLV FEMCCGWS PFYAEDTQQMYKNIAFGKVRFP RDALSTEGRN FVKGLLNRNPKHRL 782

Sch9: 657 GAIDDGRELRAHPFFADIDWEALKQKKIPPPFKPHLVSETDTSNFDPEFTTA--STSYMN 714
      GA D +EL AHPFF DIDWEAL +K + PPFKP L S+TDTSNFDPEFT A +++ +N
SchA: 783 GAKGDAKELMAHPFFHDIDWEALARKDVIPPFKPKLKS DTDTSNFDPEFTNALDNSASLN 842

Sch9: 715 KHQP-----MMTATPLSPAMQAKFAGFTFVDESAIDEHVNNN 751
      M +TPLSP MQA F GFTFV+E++ID H+ ++
SchA: 843 DRAAALANGFMPASTPLSPGMQANFKGFTFVNENSIDHMKHD 885

```

S1 Figure – (A) Protein organization of the *A. fumigatus* SchA. (B) Alignment between *S. cerevisiae* Sch9 and *A. fumigatus* SchA. Aminoacids labeled in red are those conserved residues phosphorylated by TOR.
