# Supplementary material
Source: PubMed Central journal article supplement (PMC5207228)
Supplement: NIHMS833558-supplement-S2.pdf [file NIHMS833558-supplement-S2.pdf]

A.

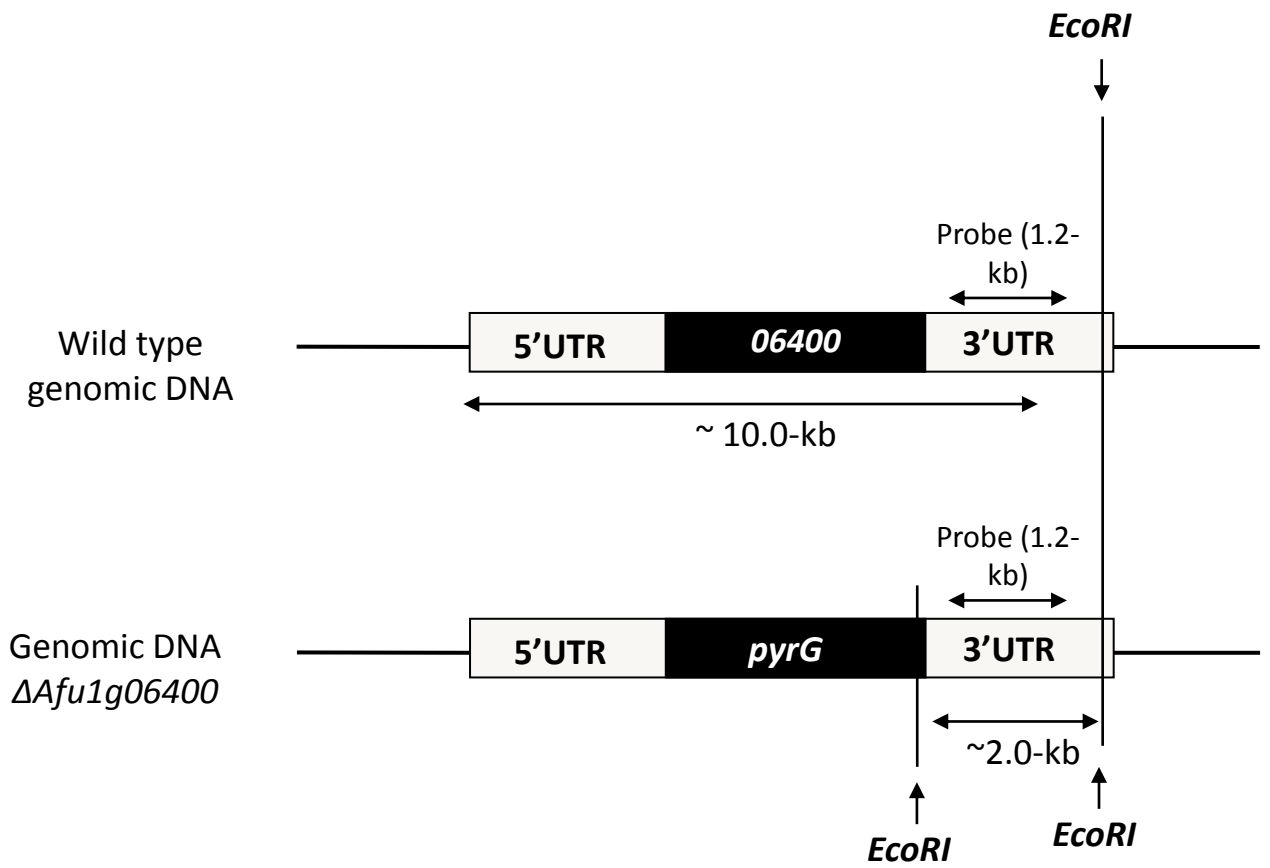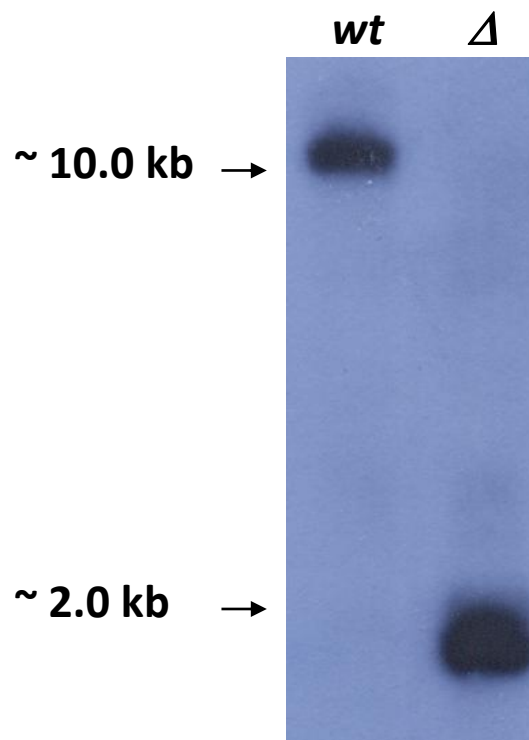

# B.

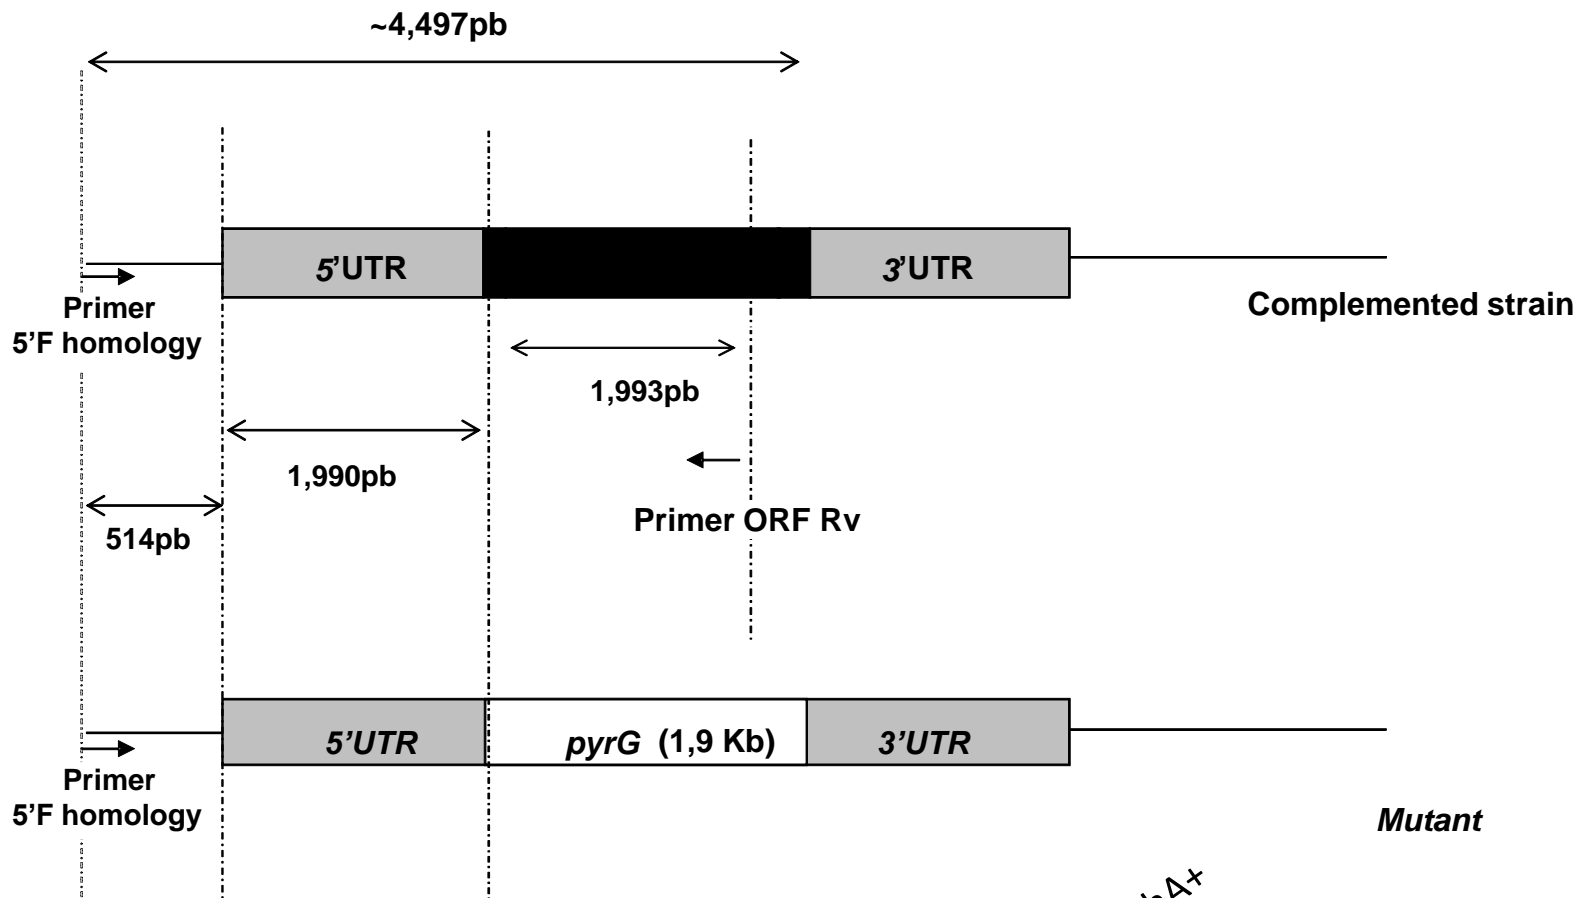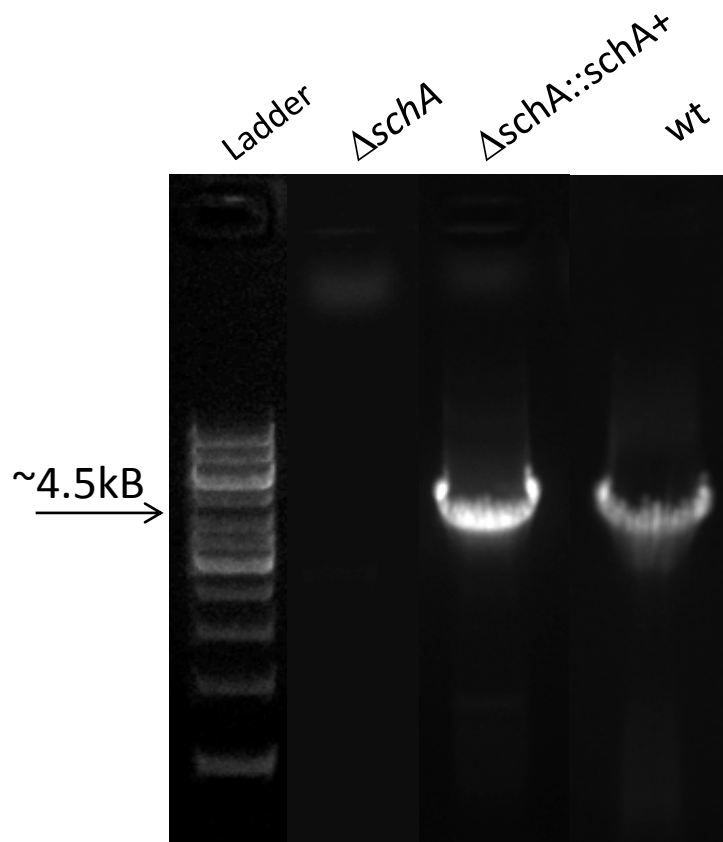

C.

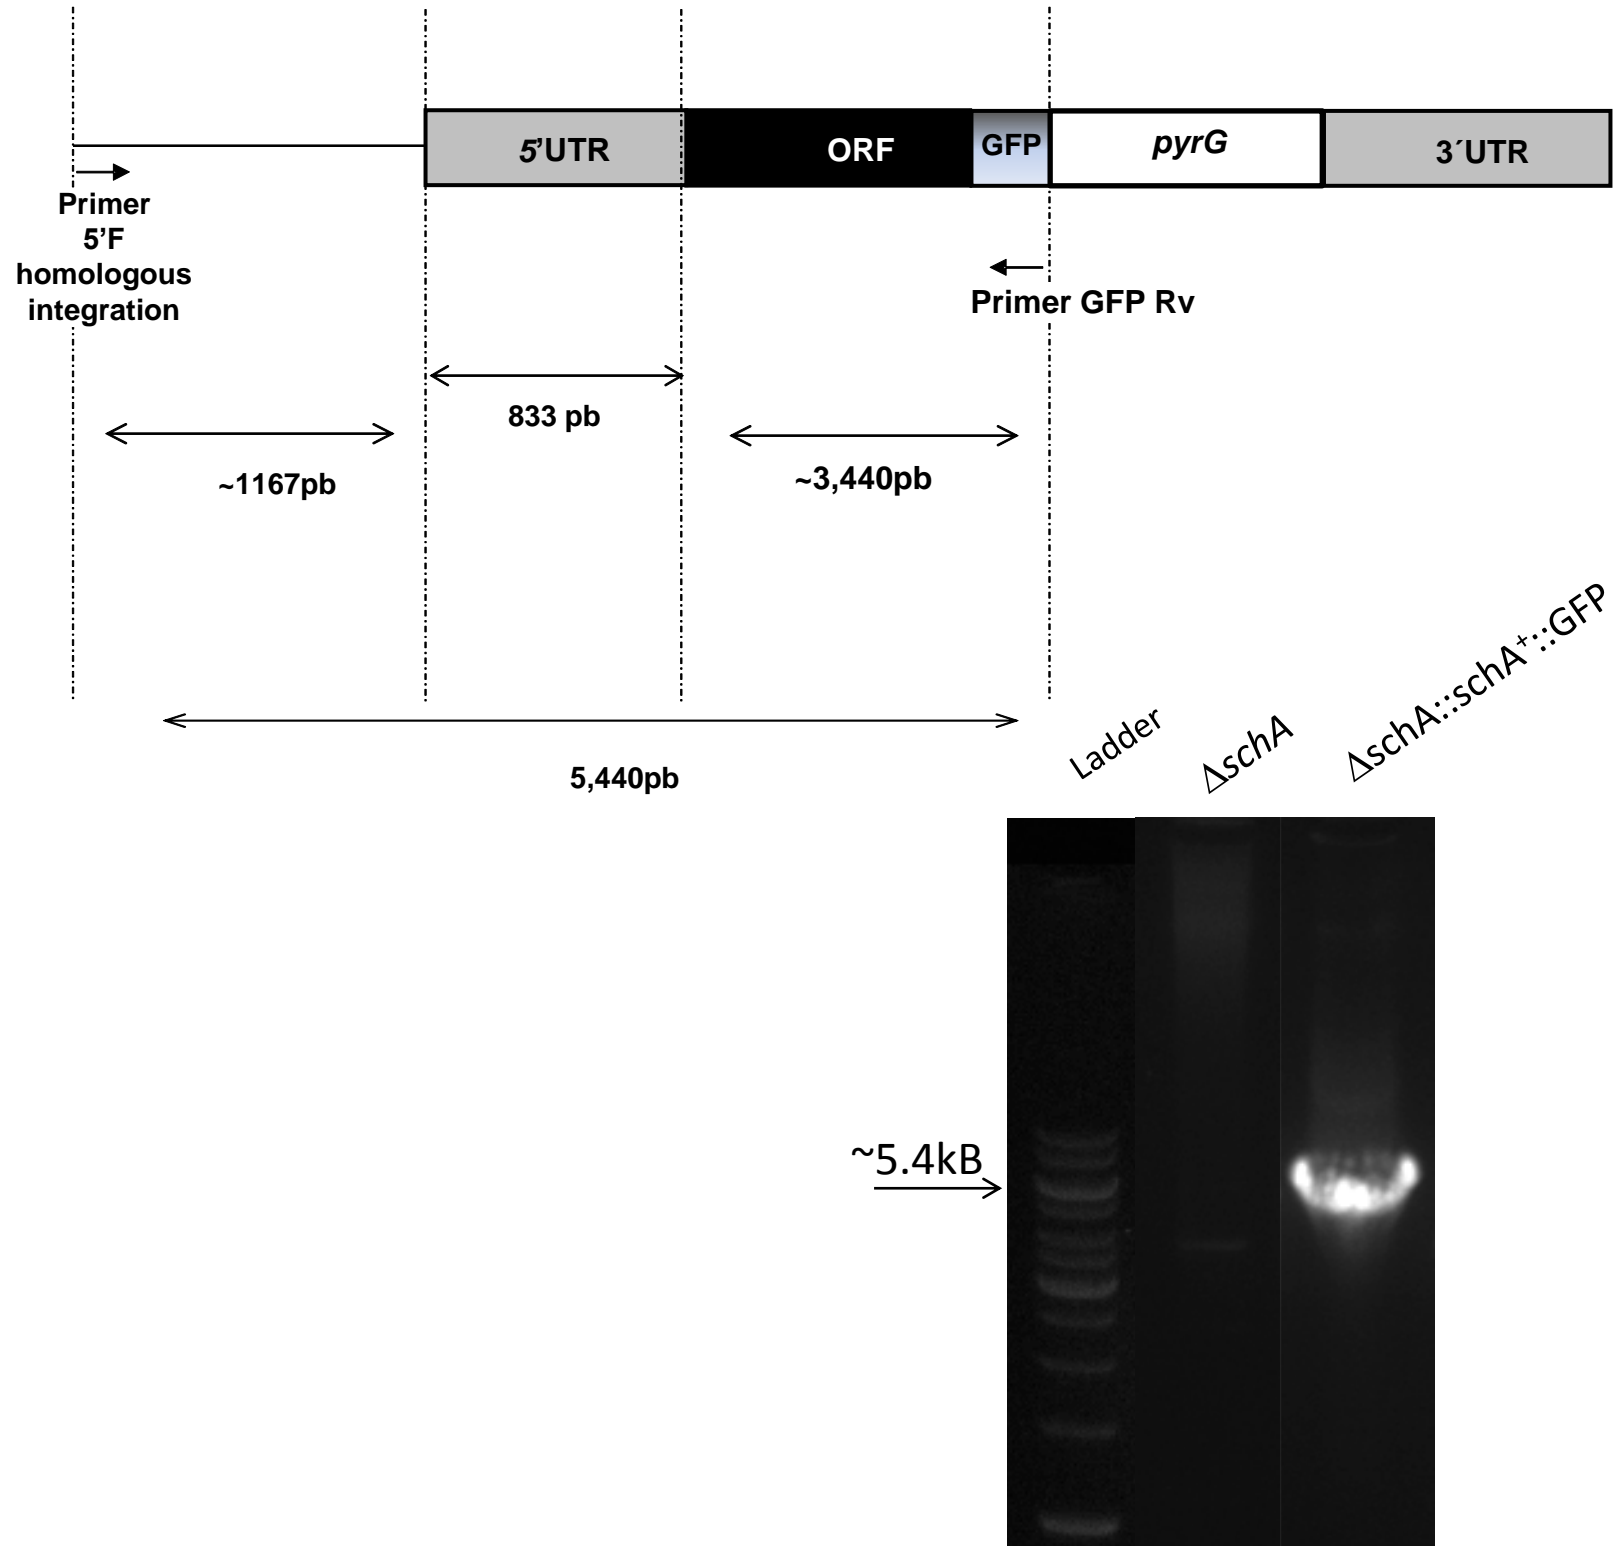

S2 Figure – (A) Deletion cassette assembly and Southern blot analysis for the  $\Delta schA$  null mutant. (B) PCR to check the complementation of the  $\Delta schA$  strain. (C) PCR scheme to check the complemented *schA::GFP* strain.
