# Supplementary material
Source: PubMed Central journal article supplement (PMC5207228)
Supplement: NIHMS833558-supplement-S4.pdf [file NIHMS833558-supplement-S4.pdf]

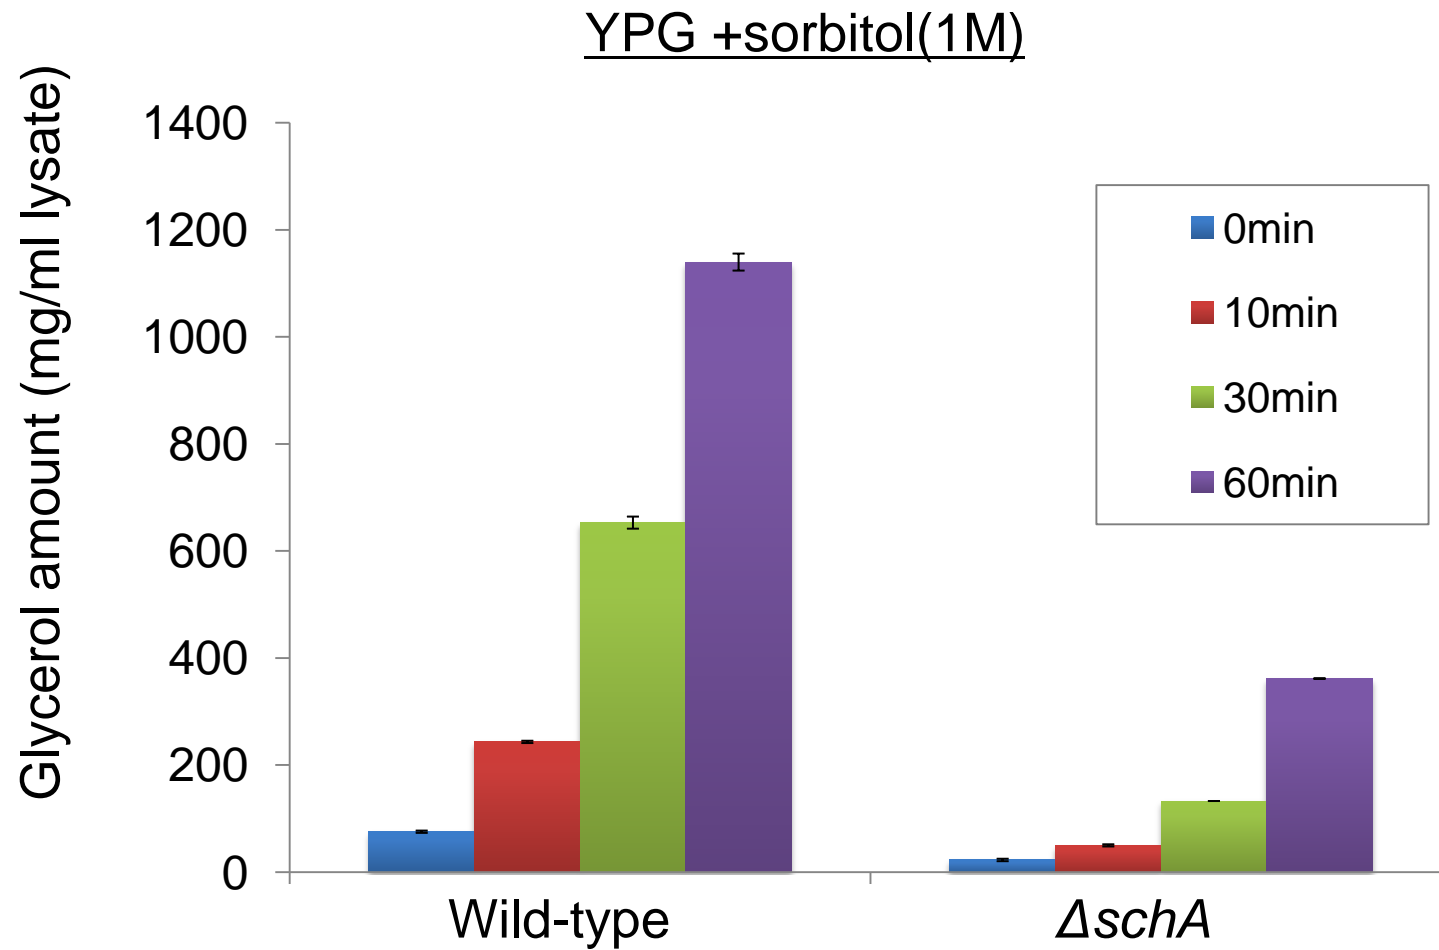

S4 Figure – Glycerol accumulation upon osmotic stress in the wild-type and  $\Delta schA$  mutant strains.
