# Supplementary material
Source: PubMed Central journal article supplement (PMC5207228)
Supplement: NIHMS833558-supplement-S13.pdf [file NIHMS833558-supplement-S13.pdf]

**S7 Table - Primers and probes used in this work**

| <b>Probe/Primer</b>            | <b>Sequence</b>                                              |
|--------------------------------|--------------------------------------------------------------|
| Afu1g06400_390FL               | cggtgCAAGCTCAAGTCTGACAC?G                                    |
| Afu1g06400_390FL/410RU         | GTCAAGAGCGTTGGTGAACCTCG                                      |
| 5'Fw homology                  | ATCAGCCAAATATTACTGAGCA                                       |
| ORF Rv                         | TCAAGCAAGACCTCGGGAGCAA                                       |
| GFP_Afu schA orf pRS426 5fw    | GTAACGCCAGGGTTTTCCAGTCACGACGCATGCACCGACT<br>GTAACCTGC        |
| GFP_Afu schA orf spacer GFP rv | AGTTCTTCTCCTTTACTCATTCCCCGTGTTCCCATATCAAAAT<br>TATCATCAACGTT |
| GFP_Afu schA 3utr pyrG 3fw     | GCATTGTTTGAGGCGAATTCTAACGTCCTCAAGATGCATGA                    |
| GFP_Afu schA 3utr pRS426 3rv   | GCGGATAACAATTTACACAGGAAACAGAGTACGGCTCGTGT<br>GAGATAG         |
| Afu schA Sybr Fw               | CCCACCGATCTGTATCTCGT                                         |
| Afu schA Sybr Rv               | CAGGATGTTTTCGGGCTTTA                                         |
| Afu B tubulina FW Sybr         | ATATGTTCTCGTGCCGTTT                                          |
| Afu B tubulina Rv Sybr         | GAGAGAGTGGGTGACCTGGA                                         |
| pyrG fw                        | ATTCTGTCTGAGAGGAGGCACTGATGCG                                 |
| pyrG rv                        | GAATTCGCCTCAAACAATGCTCTTCACC                                 |
| sakA-U-F                       | GGTGAAGCTAACGTAGGTTTGAATCACG                                 |
| sakA-D-R                       | GTCGAGCTGTCGTGAACAGGCGATTCC                                  |
| mpkC-U-F                       | TTAGTATGGCGAAATAGCTGCATAG                                    |
| mpkC-D-R                       | AATCACGTTGTCATTTAACACACC                                     |
