# Supplementary material
Source: PubMed Central journal article supplement (PMC5207228)

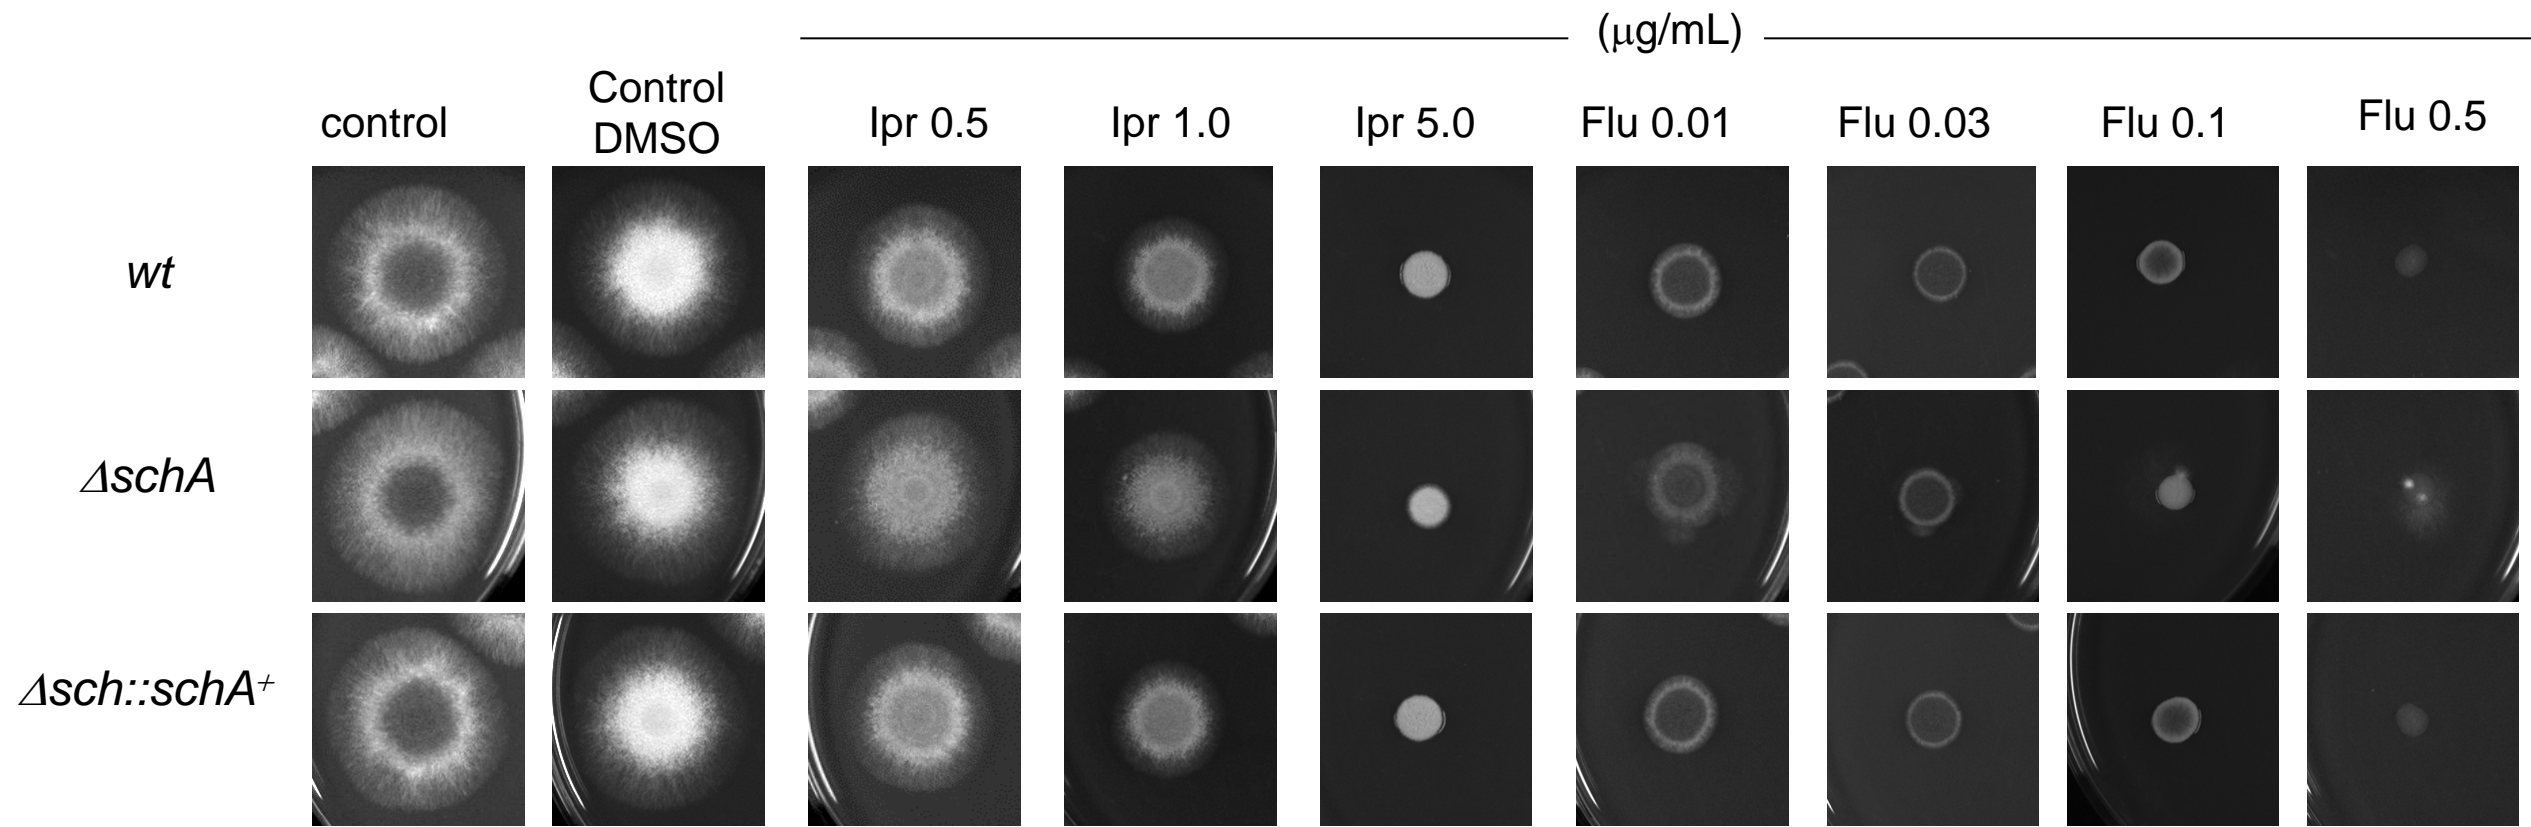

Supplementary Figure S3 – The strains were grown for 40 hours at 37 °C

Supplement: NIHMS833558-supplement-S3.pdf [file NIHMS833558-supplement-S3.pdf]
